# Supplementary material for: Proactive vs. Reactive Aggression Within Two Modified Versions of the Taylor Aggression Paradigm
Source: Frontiers journal article supplement (doi:10.3389/fnbeh.2021.749041), 2021-09-29
Supplement: Data_Sheet_1.zip [file Data_Sheet_1.zip]

## Sheet: Foglio1
Code	Trial	aggression_choice	provocation	SCRs	RPQ	BPAQ	SQ	gender	game_outcome	belief_cover_story	RPQre	SP	SR	BPAQ.z	Trial_recode
N001	2	2	1	0.251737	9	61	10	2	2	1	7	21	7	0.0880446	1
N001	3	1	1	0.0980785	9	61	10	2	2	1	7	21	7	0.0880446	2
N001	4	3	2	0.443522	9	61	10	2	1	1	7	21	7	0.0880446	1
N001	5	1	1	0.329243	9	61	10	2	1	1	7	21	7	0.0880446	2
N001	6	2	4	0.00656861	9	61	10	2	2	1	7	21	7	0.0880446	3
N001	7	1	1	0.0781754	9	61	10	2	2	1	7	21	7	0.0880446	4
N001	8	1	2	0.154495	9	61	10	2	1	1	7	21	7	0.0880446	3
N001	9	2	1	0.0599255	9	61	10	2	1	1	7	21	7	0.0880446	4
N001	10	1	2	0.0658351	9	61	10	2	1	1	7	21	7	0.0880446	5
N001	11	2	1	0.0553563	9	61	10	2	2	1	7	21	7	0.0880446	5
N001	12	1	3	0.0578239	9	61	10	2	2	1	7	21	7	0.0880446	6
N001	13	2	1	0.15891	9	61	10	2	1	1	7	21	7	0.0880446	6
N001	14	1	2	0.0406012	9	61	10	2	2	1	7	21	7	0.0880446	7
N001	15	3	1	0.0457332	9	61	10	2	2	1	7	21	7	0.0880446	8
N001	16	1	2	0.0311293	9	61	10	2	2	1	7	21	7	0.0880446	9
N001	17	1	3	0.069324	9	61	10	2	2	1	7	21	7	0.0880446	10
N001	18	3	2	0.0357641	9	61	10	2	1	1	7	21	7	0.0880446	7
N001	19	2	1	0	9	61	10	2	1	1	7	21	7	0.0880446	8
N001	20	3	3	0.0076579	9	61	10	2	2	1	7	21	7	0.0880446	11
N001	21	2	4	0.0401662	9	61	10	2	2	1	7	21	7	0.0880446	12
N001	22	4	2	0.489559	9	61	10	2	2	1	7	21	7	0.0880446	13
N001	23	3	2	0.317135	9	61	10	2	2	1	7	21	7	0.0880446	14
N001	24	1	3	0.154302	9	61	10	2	2	1	7	21	7	0.0880446	15
N001	25	1	2	0.0672713	9	61	10	2	2	1	7	21	7	0.0880446	16
N001	26	2	3	0.0241536	9	61	10	2	1	1	7	21	7	0.0880446	9
N001	27	1	4	0.167678	9	61	10	2	2	1	7	21	7	0.0880446	17
N001	28	4	2	0.0804699	9	61	10	2	2	1	7	21	7	0.0880446	18
N001	29	2	1	0.0600884	9	61	10	2	1	1	7	21	7	0.0880446	10
N001	30	1	3	0.139195	9	61	10	2	1	1	7	21	7	0.0880446	11
N001	31	1	4	0.133338	9	61	10	2	1	1	7	21	7	0.0880446	12
N001	32	1	3	0.184891	9	61	10	2	2	1	7	21	7	0.0880446	19
N001	33	4	3	0.690532	9	61	10	2	2	1	7	21	7	0.0880446	20
N001	34	2	4	0.169258	9	61	10	2	2	1	7	21	7	0.0880446	21
N001	35	2	4	1.58297	9	61	10	2	2	1	7	21	7	0.0880446	22
N001	36	1	3	0.042209	9	61	10	2	1	1	7	21	7	0.0880446	13
N001	37	1	4	0.46643	9	61	10	2	2	1	7	21	7	0.0880446	23
N001	38	2	2	0.245744	9	61	10	2	2	1	7	21	7	0.0880446	24
N001	39	2	4	0.685931	9	61	10	2	2	1	7	21	7	0.0880446	25
N001	40	4	4	0.210619	9	61	10	2	2	1	7	21	7	0.0880446	26
N002	2	2	1	0.850952	4	47	13	1	1	1	4	4	13	-0.86923	1
N002	3	2	1	0.699844	4	47	13	1	2	1	4	4	13	-0.86923	1
N002	4	2	2	0	4	47	13	1	2	1	4	4	13	-0.86923	2
N002	5	2	1	0.421537	4	47	13	1	1	1	4	4	13	-0.86923	2
N002	6	3	4	0.703878	4	47	13	1	2	1	4	4	13	-0.86923	3
N002	7	3	1	1.31888	4	47	13	1	2	1	4	4	13	-0.86923	4
N002	8	2	2	2.00215	4	47	13	1	1	1	4	4	13	-0.86923	3
N002	9	2	1	0.991963	4	47	13	1	2	1	4	4	13	-0.86923	5
N002	10	1	2	1.53733	4	47	13	1	1	1	4	4	13	-0.86923	4
N002	11	2	1	0.475481	4	47	13	1	2	1	4	4	13	-0.86923	6
N002	12	2	3	0.216772	4	47	13	1	1	1	4	4	13	-0.86923	5
N002	13	2	1	0.184551	4	47	13	1	1	1	4	4	13	-0.86923	6
N002	14	2	2	0.0221925	4	47	13	1	2	1	4	4	13	-0.86923	7
N002	15	2	1	2.01773	4	47	13	1	2	1	4	4	13	-0.86923	8
N002	16	3	2	0.179471	4	47	13	1	2	1	4	4	13	-0.86923	9
N002	17	3	3	1.00479	4	47	13	1	1	1	4	4	13	-0.86923	7
N002	18	2	2	0.0682777	4	47	13	1	1	1	4	4	13	-0.86923	8
N002	19	3	1	0.396298	4	47	13	1	2	1	4	4	13	-0.86923	10
N002	20	3	3	0.0956876	4	47	13	1	2	1	4	4	13	-0.86923	11
N002	21	4	4	0.298869	4	47	13	1	2	1	4	4	13	-0.86923	12
N002	22	4	2	1.102	4	47	13	1	2	1	4	4	13	-0.86923	13
N002	23	3	2	0.440395	4	47	13	1	1	1	4	4	13	-0.86923	9
N002	24	3	3	0.457938	4	47	13	1	2	1	4	4	13	-0.86923	14
N002	25	4	2	0.0613558	4	47	13	1	2	1	4	4	13	-0.86923	15
N002	26	3	3	0.104553	4	47	13	1	1	1	4	4	13	-0.86923	10
N002	27	1	4	0.755686	4	47	13	1	2	1	4	4	13	-0.86923	16
N002	28	2	2	0.117838	4	47	13	1	1	1	4	4	13	-0.86923	11
N002	29	2	1	0.563385	4	47	13	1	1	1	4	4	13	-0.86923	12
N002	30	3	3	0	4	47	13	1	2	1	4	4	13	-0.86923	17
N002	31	4	4	1.5335	4	47	13	1	2	1	4	4	13	-0.86923	18
N002	32	4	3	0.485135	4	47	13	1	2	1	4	4	13	-0.86923	19
N002	33	4	3	0.0741838	4	47	13	1	2	1	4	4	13	-0.86923	20
N002	34	3	4	0.985774	4	47	13	1	1	1	4	4	13	-0.86923	13
N002	35	4	4	0.146348	4	47	13	1	2	1	4	4	13	-0.86923	21
N002	36	2	3	0.10796	4	47	13	1	2	1	4	4	13	-0.86923	22
N002	37	4	4	0.106188	4	47	13	1	2	1	4	4	13	-0.86923	23
N002	38	3	2	0.37992	4	47	13	1	2	1	4	4	13	-0.86923	24
N002	39	4	4	0.325759	4	47	13	1	2	1	4	4	13	-0.86923	25
N002	40	4	4	0.836982	4	47	13	1	2	1	4	4	13	-0.86923	26
N003	2	4	1	0.0751896	6	78	33	1	1	2	6	6	17	1.25045	1
N003	3	4	1	0.235122	6	78	33	1	1	2	6	6	17	1.25045	2
N003	4	4	2	0.416404	6	78	33	1	1	2	6	6	17	1.25045	3
N003	5	4	1	0.0763861	6	78	33	1	1	2	6	6	17	1.25045	4
N003	6	4	4	0.14519	6	78	33	1	2	2	6	6	17	1.25045	1
N003	7	4	1	0.052347	6	78	33	1	1	2	6	6	17	1.25045	5
N003	8	4	2	0.239736	6	78	33	1	2	2	6	6	17	1.25045	2
N003	9	4	1	1.11532	6	78	33	1	1	2	6	6	17	1.25045	6
N003	10	4	2	0.535679	6	78	33	1	1	2	6	6	17	1.25045	7
N003	11	4	1	0.517193	6	78	33	1	1	2	6	6	17	1.25045	8
N003	12	4	3	0.635627	6	78	33	1	2	2	6	6	17	1.25045	3
N003	13	4	1	0.263613	6	78	33	1	1	2	6	6	17	1.25045	9
N003	14	4	2	0.00552852	6	78	33	1	2	2	6	6	17	1.25045	4
N003	15	4	1	0.807542	6	78	33	1	1	2	6	6	17	1.25045	10
N003	16	4	2	0.344146	6	78	33	1	1	2	6	6	17	1.25045	11
N003	17	4	3	1.05766	6	78	33	1	1	2	6	6	17	1.25045	12
N003	18	4	2	0.356206	6	78	33	1	1	2	6	6	17	1.25045	13
N003	19	4	1	0.160935	6	78	33	1	2	2	6	6	17	1.25045	5
N003	20	4	3	0.120585	6	78	33	1	2	2	6	6	17	1.25045	6
N003	21	4	4	0.771574	6	78	33	1	1	2	6	6	17	1.25045	14
N003	22	4	2	0.439412	6	78	33	1	1	2	6	6	17	1.25045	15
N003	23	1	2	0.208662	6	78	33	1	1	2	6	6	17	1.25045	16
N003	24	4	3	1.32271	6	78	33	1	2	2	6	6	17	1.25045	7
N003	25	4	2	0.245257	6	78	33	1	1	2	6	6	17	1.25045	17
N003	26	4	3	0.353233	6	78	33	1	2	2	6	6	17	1.25045	8
N003	27	4	4	0.0470948	6	78	33	1	2	2	6	6	17	1.25045	9
N003	28	4	2	0.0957202	6	78	33	1	1	2	6	6	17	1.25045	18
N003	29	4	1	0.192153	6	78	33	1	2	2	6	6	17	1.25045	10
N003	30	4	3	0.158882	6	78	33	1	1	2	6	6	17	1.25045	19
N003	31	4	4	0.178722	6	78	33	1	2	2	6	6	17	1.25045	11
N003	32	4	3	0.111757	6	78	33	1	2	2	6	6	17	1.25045	12
N003	33	4	3	0.0435735	6	78	33	1	2	2	6	6	17	1.25045	13
N003	34	4	4	0.563317	6	78	33	1	2	2	6	6	17	1.25045	14
N003	35	4	4	0.745176	6	78	33	1	2	2	6	6	17	1.25045	15
N003	36	4	3	0.231322	6	78	33	1	2	2	6	6	17	1.25045	16
N003	37	4	4	0.170412	6	78	33	1	2	2	6	6	17	1.25045	17
N003	38	4	2	0.0484013	6	78	33	1	2	2	6	6	17	1.25045	18
N003	39	4	4	0.415619	6	78	33	1	2	2	6	6	17	1.25045	19
N003	40	4	4	0.153064	6	78	33	1	2	2	6	6	17	1.25045	20
N004	2	1	1	0.101936	8	74	5	1	1	1	6	4	10	0.976942	1
N004	3	1	1	0.62231	8	74	5	1	2	1	6	4	10	0.976942	1
N004	4	1	2	0.201169	8	74	5	1	2	1	6	4	10	0.976942	2
N004	5	2	1	0.0334278	8	74	5	1	2	1	6	4	10	0.976942	3
N004	6	4	4	0.0744826	8	74	5	1	2	1	6	4	10	0.976942	4
N004	7	4	1	0.0955956	8	74	5	1	2	1	6	4	10	0.976942	5
N004	8	3	2	0.073941	8	74	5	1	1	1	6	4	10	0.976942	2
N004	9	3	1	0.0378719	8	74	5	1	2	1	6	4	10	0.976942	6
N004	10	3	2	0.239121	8	74	5	1	2	1	6	4	10	0.976942	7
N004	11	4	1	0.051795	8	74	5	1	2	1	6	4	10	0.976942	8
N004	12	4	3	0.036866	8	74	5	1	1	1	6	4	10	0.976942	3
N004	13	1	1	1.57633	8	74	5	1	2	1	6	4	10	0.976942	9
N004	14	1	2	0.923095	8	74	5	1	2	1	6	4	10	0.976942	10
N004	15	2	1	0.906266	8	74	5	1	2	1	6	4	10	0.976942	11
N004	16	2	2	0.531526	8	74	5	1	2	1	6	4	10	0.976942	12
N004	17	1	3	0.0105702	8	74	5	1	1	1	6	4	10	0.976942	4
N004	18	1	2	4.21005	8	74	5	1	2	1	6	4	10	0.976942	13
N004	19	3	1	0.0614898	8	74	5	1	2	1	6	4	10	0.976942	14
N004	20	4	3	0.802374	8	74	5	1	2	1	6	4	10	0.976942	15
N004	21	1	4	0.0443992	8	74	5	1	1	1	6	4	10	0.976942	5
N004	22	3	2	0.0655929	8	74	5	1	2	1	6	4	10	0.976942	16
N004	23	4	2	0.624546	8	74	5	1	2	1	6	4	10	0.976942	17
N004	24	4	3	1.19975	8	74	5	1	2	1	6	4	10	0.976942	18
N004	25	3	2	0.0463437	8	74	5	1	1	1	6	4	10	0.976942	6
N004	26	3	3	0.0263089	8	74	5	1	2	1	6	4	10	0.976942	19
N004	27	4	4	0.15604	8	74	5	1	2	1	6	4	10	0.976942	20
N004	28	4	2	0.109504	8	74	5	1	1	1	6	4	10	0.976942	7
N004	29	4	1	1.63646	8	74	5	1	1	1	6	4	10	0.976942	8
N004	30	4	3	0.337465	8	74	5	1	2	1	6	4	10	0.976942	21
N004	31	4	4	0.0599716	8	74	5	1	2	1	6	4	10	0.976942	22
N004	32	3	3	0.108521	8	74	5	1	1	1	6	4	10	0.976942	9
N004	33	3	3	0.473777	8	74	5	1	1	1	6	4	10	0.976942	10
N004	34	4	4	0.00656985	8	74	5	1	2	1	6	4	10	0.976942	23
N004	35	4	4	0.0084273	8	74	5	1	2	1	6	4	10	0.976942	24
N004	36	4	3	0.156683	8	74	5	1	2	1	6	4	10	0.976942	25
N004	37	2	4	0.145154	8	74	5	1	2	1	6	4	10	0.976942	26
N004	38	4	2	0.378632	8	74	5	1	2	1	6	4	10	0.976942	27
N004	39	4	4	0.563377	8	74	5	1	1	1	6	4	10	0.976942	11
N004	40	4	4	1.38816	8	74	5	1	2	1	6	4	10	0.976942	28
N005	2	1	1	0.256178	6	65	9	2	2	2	6	6	5	0.361552	1
N005	3	1	1	0.200341	6	65	9	2	1	2	6	6	5	0.361552	1
N005	4	1	2	0.161956	6	65	9	2	2	2	6	6	5	0.361552	2
N005	5	1	1	0	6	65	9	2	1	2	6	6	5	0.361552	2
N005	6	1	4	0.0114699	6	65	9	2	2	2	6	6	5	0.361552	3
N005	7	1	1	0.0633459	6	65	9	2	1	2	6	6	5	0.361552	3
N005	8	1	2	0.00808301	6	65	9	2	2	2	6	6	5	0.361552	4
N005	9	1	1	0.0213037	6	65	9	2	1	2	6	6	5	0.361552	4
N005	10	1	2	0.00710545	6	65	9	2	2	2	6	6	5	0.361552	5
N005	11	1	1	0	6	65	9	2	2	2	6	6	5	0.361552	6
N005	12	3	3	0.00803224	6	65	9	2	2	2	6	6	5	0.361552	7
N005	13	1	1	0.017927	6	65	9	2	2	2	6	6	5	0.361552	8
N005	14	1	2	0.0200752	6	65	9	2	1	2	6	6	5	0.361552	5
N005	15	1	1	0.00539883	6	65	9	2	2	2	6	6	5	0.361552	9
N005	16	1	2	0.028987	6	65	9	2	2	2	6	6	5	0.361552	10
N005	17	1	3	0.0475884	6	65	9	2	1	2	6	6	5	0.361552	6
N005	18	1	2	0.0110675	6	65	9	2	2	2	6	6	5	0.361552	11
N005	19	2	1	0.00684044	6	65	9	2	2	2	6	6	5	0.361552	12
N005	20	2	3	0.0369844	6	65	9	2	2	2	6	6	5	0.361552	13
N005	21	4	4	0.00753688	6	65	9	2	2	2	6	6	5	0.361552	14
N005	22	1	2	0.0742351	6	65	9	2	2	2	6	6	5	0.361552	15
N005	23	1	2	0.0076749	6	65	9	2	2	2	6	6	5	0.361552	16
N005	24	1	3	0.23868	6	65	9	2	2	2	6	6	5	0.361552	17
N005	25	1	2	0.08418	6	65	9	2	2	2	6	6	5	0.361552	18
N005	26	1	3	0.0250465	6	65	9	2	2	2	6	6	5	0.361552	19
N005	27	1	4	0.0082709	6	65	9	2	2	2	6	6	5	0.361552	20
N005	28	1	2	0.0357353	6	65	9	2	2	2	6	6	5	0.361552	21
N005	29	1	1	0.110737	6	65	9	2	1	2	6	6	5	0.361552	7
N005	30	1	3	0.0336133	6	65	9	2	2	2	6	6	5	0.361552	22
N005	31	1	4	0.115221	6	65	9	2	1	2	6	6	5	0.361552	8
N005	32	1	3	0.0148035	6	65	9	2	1	2	6	6	5	0.361552	9
N005	33	1	3	0.0532176	6	65	9	2	2	2	6	6	5	0.361552	23
N005	34	1	4	0.12207	6	65	9	2	2	2	6	6	5	0.361552	24
N005	35	4	4	0.0543878	6	65	9	2	2	2	6	6	5	0.361552	25
N005	36	1	3	0.054372	6	65	9	2	2	2	6	6	5	0.361552	26
N005	37	1	4	0.164045	6	65	9	2	2	2	6	6	5	0.361552	27
N005	38	1	2	0.0447384	6	65	9	2	2	2	6	6	5	0.361552	28
N005	39	1	4	0.0415607	6	65	9	2	2	2	6	6	5	0.361552	29
N005	40	1	4	0.0287968	6	65	9	2	2	2	6	6	5	0.361552	30
N006	2	1	1	0.571125	7	60	11	2	2	2	6	9	6	0.0196678	1
N006	3	1	1	0.7215	7	60	11	2	2	2	6	9	6	0.0196678	2
N006	4	2	2	1.82277	7	60	11	2	2	2	6	9	6	0.0196678	3
N006	5	1	1	2.5639	7	60	11	2	2	2	6	9	6	0.0196678	4
N006	6	4	4	0.973679	7	60	11	2	2	2	6	9	6	0.0196678	5
N006	7	1	1	0.777756	7	60	11	2	1	2	6	9	6	0.0196678	1
N006	8	4	2	0.50535	7	60	11	2	2	2	6	9	6	0.0196678	6
N006	9	4	1	0.418351	7	60	11	2	1	2	6	9	6	0.0196678	2
N006	10	2	2	1.1775	7	60	11	2	1	2	6	9	6	0.0196678	3
N006	11	1	1	0.0413288	7	60	11	2	1	2	6	9	6	0.0196678	4
N006	12	2	3	0.219966	7	60	11	2	2	2	6	9	6	0.0196678	7
N006	13	1	1	0.408689	7	60	11	2	2	2	6	9	6	0.0196678	8
N006	14	1	2	0.213031	7	60	11	2	2	2	6	9	6	0.0196678	9
N006	15	1	1	0.00608289	7	60	11	2	1	2	6	9	6	0.0196678	5
N006	16	1	2	0.0356675	7	60	11	2	1	2	6	9	6	0.0196678	6
N006	17	3	3	0.128361	7	60	11	2	2	2	6	9	6	0.0196678	10
N006	18	1	2	0.0962928	7	60	11	2	2	2	6	9	6	0.0196678	11
N006	19	1	1	0.0757142	7	60	11	2	2	2	6	9	6	0.0196678	12
N006	20	1	3	0.0563369	7	60	11	2	2	2	6	9	6	0.0196678	13
N006	21	1	4	0.547101	7	60	11	2	1	2	6	9	6	0.0196678	7
N006	22	1	2	0.0567841	7	60	11	2	2	2	6	9	6	0.0196678	14
N006	23	3	2	0.0610916	7	60	11	2	2	2	6	9	6	0.0196678	15
N006	24	4	3	0.274079	7	60	11	2	1	2	6	9	6	0.0196678	8
N006	25	1	2	0.13008	7	60	11	2	2	2	6	9	6	0.0196678	16
N006	26	3	3	0.125466	7	60	11	2	2	2	6	9	6	0.0196678	17
N006	27	1	4	0.0553098	7	60	11	2	2	2	6	9	6	0.0196678	18
N006	28	1	2	0.0751464	7	60	11	2	1	2	6	9	6	0.0196678	9
N006	29	1	1	0.018518	7	60	11	2	2	2	6	9	6	0.0196678	19
N006	30	1	3	0.0495995	7	60	11	2	2	2	6	9	6	0.0196678	20
N006	31	4	4	0.0252857	7	60	11	2	2	2	6	9	6	0.0196678	21
N006	32	4	3	0.238138	7	60	11	2	2	2	6	9	6	0.0196678	22
N006	33	3	3	0.0420414	7	60	11	2	2	2	6	9	6	0.0196678	23
N006	34	3	4	0	7	60	11	2	2	2	6	9	6	0.0196678	24
N006	35	3	4	0	7	60	11	2	1	2	6	9	6	0.0196678	10
N006	36	3	3	0.0725137	7	60	11	2	1	2	6	9	6	0.0196678	11
N006	37	3	4	0.0686113	7	60	11	2	2	2	6	9	6	0.0196678	25
N006	38	4	2	0.606895	7	60	11	2	1	2	6	9	6	0.0196678	12
N006	39	3	4	0.0242464	7	60	11	2	2	2	6	9	6	0.0196678	26
N006	40	3	4	0	7	60	11	2	1	2	6	9	6	0.0196678	13
N007	2	4	1	0	6	43	3	1	1	2	6	4	3	-1.14274	1
N007	3	4	1	0.0971599	6	43	3	1	1	2	6	4	3	-1.14274	2
N007	4	4	2	0.249697	6	43	3	1	1	2	6	4	3	-1.14274	3
N007	5	4	1	0.0739608	6	43	3	1	1	2	6	4	3	-1.14274	4
N007	6	4	4	0.395694	6	43	3	1	1	2	6	4	3	-1.14274	5
N007	7	4	1	0.0359653	6	43	3	1	1	2	6	4	3	-1.14274	6
N007	8	4	2	0	6	43	3	1	1	2	6	4	3	-1.14274	7
N007	9	4	1	0.0806961	6	43	3	1	2	2	6	4	3	-1.14274	1
N007	10	4	2	0.0147692	6	43	3	1	1	2	6	4	3	-1.14274	8
N007	11	4	1	0.212589	6	43	3	1	1	2	6	4	3	-1.14274	9
N007	12	4	3	0.00663137	6	43	3	1	1	2	6	4	3	-1.14274	10
N007	13	4	1	0.205111	6	43	3	1	2	2	6	4	3	-1.14274	2
N007	14	4	2	0.112891	6	43	3	1	1	2	6	4	3	-1.14274	11
N007	15	4	1	0.101989	6	43	3	1	2	2	6	4	3	-1.14274	3
N007	16	4	2	0.0308928	6	43	3	1	1	2	6	4	3	-1.14274	12
N007	17	4	3	0.0111966	6	43	3	1	1	2	6	4	3	-1.14274	13
N007	18	4	2	0	6	43	3	1	1	2	6	4	3	-1.14274	14
N007	19	4	1	0.0131664	6	43	3	1	1	2	6	4	3	-1.14274	15
N007	20	4	3	0.0552543	6	43	3	1	2	2	6	4	3	-1.14274	4
N007	21	4	4	0.0615209	6	43	3	1	1	2	6	4	3	-1.14274	16
N007	22	4	2	0.541552	6	43	3	1	2	2	6	4	3	-1.14274	5
N007	23	4	2	0	6	43	3	1	1	2	6	4	3	-1.14274	17
N007	24	4	3	0.00664891	6	43	3	1	1	2	6	4	3	-1.14274	18
N007	25	4	2	1.56137	6	43	3	1	1	2	6	4	3	-1.14274	19
N007	26	4	3	0	6	43	3	1	2	2	6	4	3	-1.14274	6
N007	27	4	4	0	6	43	3	1	1	2	6	4	3	-1.14274	20
N007	28	4	2	0.0355237	6	43	3	1	1	2	6	4	3	-1.14274	21
N007	29	4	1	0.0333205	6	43	3	1	2	2	6	4	3	-1.14274	7
N007	30	4	3	0.247515	6	43	3	1	2	2	6	4	3	-1.14274	8
N007	31	4	4	1.57611	6	43	3	1	2	2	6	4	3	-1.14274	9
N007	32	4	3	0.00447518	6	43	3	1	2	2	6	4	3	-1.14274	10
N007	33	4	3	0.0012682	6	43	3	1	2	2	6	4	3	-1.14274	11
N007	34	4	4	1.22222	6	43	3	1	2	2	6	4	3	-1.14274	12
N007	35	4	4	3.26434	6	43	3	1	2	2	6	4	3	-1.14274	13
N007	36	4	3	0.0435775	6	43	3	1	1	2	6	4	3	-1.14274	22
N007	37	4	4	0.0981593	6	43	3	1	2	2	6	4	3	-1.14274	14
N007	38	4	2	0.366683	6	43	3	1	2	2	6	4	3	-1.14274	15
N007	39	4	4	0.835019	6	43	3	1	2	2	6	4	3	-1.14274	16
N007	40	4	4	0	6	43	3	1	1	2	6	4	3	-1.14274	23
N008	2	1	1	0.279707	1	44	3	1	2	2	1	3	10	-1.07436	1
N008	3	1	1	0.102053	1	44	3	1	2	2	1	3	10	-1.07436	2
N008	4	1	2	0.184615	1	44	3	1	2	2	1	3	10	-1.07436	3
N008	5	1	1	0.116245	1	44	3	1	1	2	1	3	10	-1.07436	1
N008	6	1	4	0.222723	1	44	3	1	2	2	1	3	10	-1.07436	4
N008	7	4	1	0.270827	1	44	3	1	1	2	1	3	10	-1.07436	2
N008	8	1	2	0.306238	1	44	3	1	1	2	1	3	10	-1.07436	3
N008	9	4	1	0.244566	1	44	3	1	2	2	1	3	10	-1.07436	5
N008	10	2	2	0.311145	1	44	3	1	1	2	1	3	10	-1.07436	4
N008	11	1	1	0.295865	1	44	3	1	2	2	1	3	10	-1.07436	6
N008	12	1	3	0.311833	1	44	3	1	2	2	1	3	10	-1.07436	7
N008	13	1	1	0.103748	1	44	3	1	1	2	1	3	10	-1.07436	5
N008	14	1	2	0.184424	1	44	3	1	2	2	1	3	10	-1.07436	8
N008	15	1	1	0.259269	1	44	3	1	2	2	1	3	10	-1.07436	9
N008	16	1	2	0.119165	1	44	3	1	1	2	1	3	10	-1.07436	6
N008	17	1	3	0.394973	1	44	3	1	2	2	1	3	10	-1.07436	10
N008	18	1	2	0.15865	1	44	3	1	2	2	1	3	10	-1.07436	11
N008	19	4	1	0.193252	1	44	3	1	2	2	1	3	10	-1.07436	12
N008	20	4	3	0.167286	1	44	3	1	1	2	1	3	10	-1.07436	7
N008	21	4	4	0.0566063	1	44	3	1	2	2	1	3	10	-1.07436	13
N008	22	1	2	0.215891	1	44	3	1	1	2	1	3	10	-1.07436	8
N008	23	1	2	0.151667	1	44	3	1	2	2	1	3	10	-1.07436	14
N008	24	1	3	0.472924	1	44	3	1	1	2	1	3	10	-1.07436	9
N008	25	2	2	0.110763	1	44	3	1	1	2	1	3	10	-1.07436	10
N008	26	3	3	0.224951	1	44	3	1	2	2	1	3	10	-1.07436	15
N008	27	4	4	0.0336907	1	44	3	1	2	2	1	3	10	-1.07436	16
N008	28	1	2	0.154832	1	44	3	1	1	2	1	3	10	-1.07436	11
N008	29	1	1	0.325594	1	44	3	1	2	2	1	3	10	-1.07436	17
N008	30	1	3	0.111733	1	44	3	1	2	2	1	3	10	-1.07436	18
N008	31	1	4	0.534941	1	44	3	1	2	2	1	3	10	-1.07436	19
N008	32	1	3	0.0505518	1	44	3	1	2	2	1	3	10	-1.07436	20
N008	33	2	3	0.20213	1	44	3	1	1	2	1	3	10	-1.07436	12
N008	34	4	4	0.201584	1	44	3	1	2	2	1	3	10	-1.07436	21
N008	35	4	4	0.114491	1	44	3	1	2	2	1	3	10	-1.07436	22
N008	36	4	3	0.158564	1	44	3	1	2	2	1	3	10	-1.07436	23
N008	37	1	4	0.0871523	1	44	3	1	1	2	1	3	10	-1.07436	13
N008	38	1	2	0.111678	1	44	3	1	2	2	1	3	10	-1.07436	24
N008	39	1	4	0.331845	1	44	3	1	2	2	1	3	10	-1.07436	25
N008	40	1	4	0.425699	1	44	3	1	2	2	1	3	10	-1.07436	26
N009	2	1	1	0.172193	8		17	2	1	2	6	6	10		1
N009	3	1	1	0.196244	8		17	2	2	2	6	6	10		1
N009	4	1	2	0.0854755	8		17	2	2	2	6	6	10		2
N009	5	1	1	0.0364987	8		17	2	2	2	6	6	10		3
N009	6	1	4	0.259627	8		17	2	2	2	6	6	10		4
N009	7	1	1	0.119174	8		17	2	1	2	6	6	10		2
N009	8	1	2	0.152612	8		17	2	2	2	6	6	10		5
N009	9	1	1	0.104845	8		17	2	1	2	6	6	10		3
N009	10	1	2	0.44878	8		17	2	2	2	6	6	10		6
N009	11	1	1	0.0897491	8		17	2	2	2	6	6	10		7
N009	12	1	3	0.209307	8		17	2	1	2	6	6	10		4
N009	13	1	1	4.81047	8		17	2	2	2	6	6	10		8
N009	14	1	2	0.0209126	8		17	2	2	2	6	6	10		9
N009	15	1	1	0.73818	8		17	2	2	2	6	6	10		10
N009	16	1	2	0.0840624	8		17	2	2	2	6	6	10		11
N009	17	1	3	0.0361711	8		17	2	2	2	6	6	10		12
N009	18	1	2	0.0862106	8		17	2	1	2	6	6	10		5
N009	19	1	1	0.311972	8		17	2	1	2	6	6	10		6
N009	20	1	3	0.680387	8		17	2	1	2	6	6	10		7
N009	21	1	4	1.19529	8		17	2	2	2	6	6	10		13
N009	22	1	2	0.0605541	8		17	2	2	2	6	6	10		14
N009	23	1	2	0.0417102	8		17	2	2	2	6	6	10		15
N009	24	1	3	0.0877896	8		17	2	2	2	6	6	10		16
N009	25	1	2	4.15738	8		17	2	2	2	6	6	10		17
N009	26	1	3	0.329318	8		17	2	1	2	6	6	10		8
N009	27	1	4	0.63456	8		17	2	2	2	6	6	10		18
N009	28	1	2	0.0777725	8		17	2	2	2	6	6	10		19
N009	29	1	1	0.586011	8		17	2	2	2	6	6	10		20
N009	30	1	3	0.376227	8		17	2	1	2	6	6	10		9
N009	31	1	4	0.506529	8		17	2	2	2	6	6	10		21
N009	32	1	3	5.61618	8		17	2	2	2	6	6	10		22
N009	33	1	3	0.0997906	8		17	2	1	2	6	6	10		10
N009	34	1	4	0.240229	8		17	2	2	2	6	6	10		23
N009	35	1	4	0.0781516	8		17	2	2	2	6	6	10		24
N009	36	1	3	0.165496	8		17	2	2	2	6	6	10		25
N009	37	1	4	0.155878	8		17	2	2	2	6	6	10		26
N009	38	1	2	0.0821364	8		17	2	2	2	6	6	10		27
N009	39	1	4	0.222471	8		17	2	2	2	6	6	10		28
N009	40	1	4	0.0587799	8		17	2	2	2	6	6	10		29
N010	2	1	1	0.604802	11	73	13	2	1	1	10	16	3	0.908566	1
N010	3	1	1	0.0950327	11	73	13	2	1	1	10	16	3	0.908566	2
N010	4	1	2	0.049205	11	73	13	2	2	1	10	16	3	0.908566	1
N010	5	2	1	2.89102	11	73	13	2	2	1	10	16	3	0.908566	2
N010	6	2	4	0.0645052	11	73	13	2	2	1	10	16	3	0.908566	3
N010	7	1	1	0.248672	11	73	13	2	1	1	10	16	3	0.908566	3
N010	8	4	2	0.81767	11	73	13	2	2	1	10	16	3	0.908566	4
N010	9	3	1	0.0491136	11	73	13	2	1	1	10	16	3	0.908566	4
N010	10	2	2	0.120552	11	73	13	2	2	1	10	16	3	0.908566	5
N010	11	1	1	0.00952528	11	73	13	2	1	1	10	16	3	0.908566	5
N010	12	1	3	0.0899525	11	73	13	2	1	1	10	16	3	0.908566	6
N010	13	2	1	0.153167	11	73	13	2	2	1	10	16	3	0.908566	6
N010	14	1	2	0.0421666	11	73	13	2	2	1	10	16	3	0.908566	7
N010	15	1	1	0.012804	11	73	13	2	1	1	10	16	3	0.908566	7
N010	16	4	2	0.0616361	11	73	13	2	2	1	10	16	3	0.908566	8
N010	17	4	3	0.315544	11	73	13	2	2	1	10	16	3	0.908566	9
N010	18	1	2	0.0179801	11	73	13	2	1	1	10	16	3	0.908566	8
N010	19	1	1	0.0591444	11	73	13	2	1	1	10	16	3	0.908566	9
N010	20	2	3	0.0260672	11	73	13	2	2	1	10	16	3	0.908566	10
N010	21	3	4	0.110522	11	73	13	2	2	1	10	16	3	0.908566	11
N010	22	4	2	0.856865	11	73	13	2	2	1	10	16	3	0.908566	12
N010	23	4	2	0.224304	11	73	13	2	2	1	10	16	3	0.908566	13
N010	24	3	3	0.0262408	11	73	13	2	2	1	10	16	3	0.908566	14
N010	25	2	2	0.0584335	11	73	13	2	1	1	10	16	3	0.908566	10
N010	26	1	3	0.0916236	11	73	13	2	2	1	10	16	3	0.908566	15
N010	27	2	4	1.49415	11	73	13	2	2	1	10	16	3	0.908566	16
N010	28	4	2	0.0884378	11	73	13	2	2	1	10	16	3	0.908566	17
N010	29	4	1	0.16288	11	73	13	2	2	1	10	16	3	0.908566	18
N010	30	3	3	0.0520206	11	73	13	2	1	1	10	16	3	0.908566	11
N010	31	2	4	0.039859	11	73	13	2	2	1	10	16	3	0.908566	19
N010	32	4	3	0.081225	11	73	13	2	2	1	10	16	3	0.908566	20
N010	33	1	3	0.803279	11	73	13	2	2	1	10	16	3	0.908566	21
N010	34	3	4	0.00993858	11	73	13	2	2	1	10	16	3	0.908566	22
N010	35		4		11	73	13	2	2	1	10	16	3	0.908566	23
N010	36	2	3	0.0205191	11	73	13	2	2	1	10	16	3	0.908566	24
N010	37	4	4	0.819143	11	73	13	2	2	1	10	16	3	0.908566	25
N010	38	4	2	0.113501	11	73	13	2	2	1	10	16	3	0.908566	26
N010	39	4	4	0.0957591	11	73	13	2	2	1	10	16	3	0.908566	27
N010	40	4	4	0.348094	11	73	13	2	2	1	10	16	3	0.908566	28
N011	2	1	1	0.0172293	5	47	18	1	2	2	5	9	6	-0.86923	1
N011	3	1	1	0.0486164	5	47	18	1	2	2	5	9	6	-0.86923	2
N011	4	2	2	0.0971897	5	47	18	1	1	2	5	9	6	-0.86923	1
N011	5	4	1	0.00822986	5	47	18	1	1	2	5	9	6	-0.86923	2
N011	6	4	4	0.0325306	5	47	18	1	2	2	5	9	6	-0.86923	3
N011	7	4	1	0.101656	5	47	18	1	1	2	5	9	6	-0.86923	3
N011	8	4	2	0.0615905	5	47	18	1	1	2	5	9	6	-0.86923	4
N011	9	4	1	0.0188776	5	47	18	1	1	2	5	9	6	-0.86923	5
N011	10	1	2	0.00225466	5	47	18	1	1	2	5	9	6	-0.86923	6
N011	11	1	1	0.0544842	5	47	18	1	2	2	5	9	6	-0.86923	4
N011	12	1	3	0.000809793	5	47	18	1	2	2	5	9	6	-0.86923	5
N011	13	1	1	0.681167	5	47	18	1	2	2	5	9	6	-0.86923	6
N011	14	4	2	0.0128116	5	47	18	1	1	2	5	9	6	-0.86923	7
N011	15	4	1	0.0185244	5	47	18	1	1	2	5	9	6	-0.86923	8
N011	16	4	2	0	5	47	18	1	1	2	5	9	6	-0.86923	9
N011	17	4	3	0.00860367	5	47	18	1	2	2	5	9	6	-0.86923	7
N011	18	4	2	1.89386	5	47	18	1	1	2	5	9	6	-0.86923	10
N011	19	4	1	0.0324872	5	47	18	1	1	2	5	9	6	-0.86923	11
N011	20	4	3	0.14644	5	47	18	1	1	2	5	9	6	-0.86923	12
N011	21	4	4	0	5	47	18	1	2	2	5	9	6	-0.86923	8
N011	22	4	2	0.010401	5	47	18	1	1	2	5	9	6	-0.86923	13
N011	23	4	2	0.0195872	5	47	18	1	1	2	5	9	6	-0.86923	14
N011	24	4	3	0.0251355	5	47	18	1	2	2	5	9	6	-0.86923	9
N011	25	4	2	0.0176183	5	47	18	1	2	2	5	9	6	-0.86923	10
N011	26	4	3	0.0977254	5	47	18	1	2	2	5	9	6	-0.86923	11
N011	27	4	4	0.0725288	5	47	18	1	2	2	5	9	6	-0.86923	12
N011	28	4	2	0.0661176	5	47	18	1	1	2	5	9	6	-0.86923	15
N011	29	4	1	0.145332	5	47	18	1	2	2	5	9	6	-0.86923	13
N011	30	1	3	0.0319365	5	47	18	1	1	2	5	9	6	-0.86923	16
N011	31	1	4	0.102141	5	47	18	1	1	2	5	9	6	-0.86923	17
N011	32	4	3	0.0305549	5	47	18	1	2	2	5	9	6	-0.86923	14
N011	33	4	3	0.0251563	5	47	18	1	1	2	5	9	6	-0.86923	18
N011	34	4	4	0.056715	5	47	18	1	2	2	5	9	6	-0.86923	15
N011	35	4	4	0.0183443	5	47	18	1	2	2	5	9	6	-0.86923	16
N011	36	4	3	0.124279	5	47	18	1	2	2	5	9	6	-0.86923	17
N011	37	4	4	0.136741	5	47	18	1	2	2	5	9	6	-0.86923	18
N011	38	4	2	0.0344911	5	47	18	1	2	2	5	9	6	-0.86923	19
N011	39	4	4	0.0430789	5	47	18	1	1	2	5	9	6	-0.86923	19
N011	40	4	4	0.0301436	5	47	18	1	1	2	5	9	6	-0.86923	20
N012	2	2	1	0.269874	10	71	27	1	2	2	6	8	14	0.771812	1
N012	3	2	1	0.169098	10	71	27	1	2	2	6	8	14	0.771812	2
N012	4	1	2	0.410244	10	71	27	1	1	2	6	8	14	0.771812	1
N012	5	1	1	0	10	71	27	1	1	2	6	8	14	0.771812	2
N012	6	1	4	0.244752	10	71	27	1	2	2	6	8	14	0.771812	3
N012	7	1	1	0.232409	10	71	27	1	1	2	6	8	14	0.771812	3
N012	8	1	2	0.0226409	10	71	27	1	2	2	6	8	14	0.771812	4
N012	9	1	1	0.00968855	10	71	27	1	2	2	6	8	14	0.771812	5
N012	10	2	2	0.146088	10	71	27	1	2	2	6	8	14	0.771812	6
N012	11	2	1	0.0788281	10	71	27	1	2	2	6	8	14	0.771812	7
N012	12	2	3	0.0112407	10	71	27	1	2	2	6	8	14	0.771812	8
N012	13	2	1	1.90058	10	71	27	1	2	2	6	8	14	0.771812	9
N012	14	2	2	0.0400557	10	71	27	1	2	2	6	8	14	0.771812	10
N012	15	4	1	0.273128	10	71	27	1	1	2	6	8	14	0.771812	4
N012	16	4	2	0.0807181	10	71	27	1	2	2	6	8	14	0.771812	11
N012	17	4	3	0.0759025	10	71	27	1	2	2	6	8	14	0.771812	12
N012	18	1	2	1.13334	10	71	27	1	2	2	6	8	14	0.771812	13
N012	19	1	1	0.0998458	10	71	27	1	1	2	6	8	14	0.771812	5
N012	20	1	3	0.0910248	10	71	27	1	2	2	6	8	14	0.771812	14
N012	21	1	4	0.163201	10	71	27	1	2	2	6	8	14	0.771812	15
N012	22	1	2	0.0407592	10	71	27	1	1	2	6	8	14	0.771812	6
N012	23	1	2	0.419401	10	71	27	1	1	2	6	8	14	0.771812	7
N012	24	1	3	0.0795067	10	71	27	1	2	2	6	8	14	0.771812	16
N012	25	1	2	0.170742	10	71	27	1	2	2	6	8	14	0.771812	17
N012	26	1	3	0.328662	10	71	27	1	2	2	6	8	14	0.771812	18
N012	27	2	4	0.206534	10	71	27	1	2	2	6	8	14	0.771812	19
N012	28	2	2	0.118857	10	71	27	1	1	2	6	8	14	0.771812	8
N012	29	2	1	0.209771	10	71	27	1	1	2	6	8	14	0.771812	9
N012	30	1	3	0	10	71	27	1	1	2	6	8	14	0.771812	10
N012	31	1	4	0.2083	10	71	27	1	2	2	6	8	14	0.771812	20
N012	32	1	3	0.463712	10	71	27	1	1	2	6	8	14	0.771812	11
N012	33	1	3	0.0156839	10	71	27	1	2	2	6	8	14	0.771812	21
N012	34	2	4	0.497568	10	71	27	1	2	2	6	8	14	0.771812	22
N012	35	4	4	0.247068	10	71	27	1	2	2	6	8	14	0.771812	23
N012	36	4	3	0.290426	10	71	27	1	2	2	6	8	14	0.771812	24
N012	37	4	4	0.418583	10	71	27	1	2	2	6	8	14	0.771812	25
N012	38	4	2	0.000305011	10	71	27	1	2	2	6	8	14	0.771812	26
N012	39	4	4	0	10	71	27	1	2	2	6	8	14	0.771812	27
N012	40	1	4	0.662159	10	71	27	1	2	2	6	8	14	0.771812	28
N013	2	1	1	0.0291669	10	68	9	2	2	2	10	14	12	0.566682	1
N013	3	1	1	0.00525283	10	68	9	2	1	2	10	14	12	0.566682	1
N013	4	1	2	0.00872267	10	68	9	2	2	2	10	14	12	0.566682	2
N013	5	1	1	0.00618099	10	68	9	2	2	2	10	14	12	0.566682	3
N013	6	1	4	0.0104326	10	68	9	2	2	2	10	14	12	0.566682	4
N013	7	1	1	0.00515913	10	68	9	2	2	2	10	14	12	0.566682	5
N013	8	1	2	0.00689817	10	68	9	2	2	2	10	14	12	0.566682	6
N013	9	1	1	0.0159025	10	68	9	2	2	2	10	14	12	0.566682	7
N013	10	1	2	0.0178546	10	68	9	2	1	2	10	14	12	0.566682	2
N013	11	1	1	0.0226115	10	68	9	2	2	2	10	14	12	0.566682	8
N013	12	1	3	0.0198006	10	68	9	2	2	2	10	14	12	0.566682	9
N013	13	1	1	0.0252862	10	68	9	2	2	2	10	14	12	0.566682	10
N013	14	1	2	0.0204115	10	68	9	2	2	2	10	14	12	0.566682	11
N013	15	1	1	0.0323346	10	68	9	2	2	2	10	14	12	0.566682	12
N013	16	1	2	0.0382502	10	68	9	2	2	2	10	14	12	0.566682	13
N013	17	1	3	0.0244205	10	68	9	2	2	2	10	14	12	0.566682	14
N013	18	1	2	0.0335516	10	68	9	2	2	2	10	14	12	0.566682	15
N013	19	1	1	0.0172514	10	68	9	2	1	2	10	14	12	0.566682	3
N013	20	1	3	0.0126185	10	68	9	2	2	2	10	14	12	0.566682	16
N013	21	1	4	0.00294909	10	68	9	2	2	2	10	14	12	0.566682	17
N013	22	1	2	0.0197809	10	68	9	2	2	2	10	14	12	0.566682	18
N013	23	1	2	0.00212674	10	68	9	2	1	2	10	14	12	0.566682	4
N013	24	1	3	0.000808656	10	68	9	2	2	2	10	14	12	0.566682	19
N013	25	1	2	0.0182681	10	68	9	2	1	2	10	14	12	0.566682	5
N013	26	1	3	0.0399654	10	68	9	2	2	2	10	14	12	0.566682	20
N013	27	1	4	0.012186	10	68	9	2	2	2	10	14	12	0.566682	21
N013	28	1	2	0.0113207	10	68	9	2	2	2	10	14	12	0.566682	22
N013	29	1	1	0.0207803	10	68	9	2	2	2	10	14	12	0.566682	23
N013	30	1	3	0.0109038	10	68	9	2	2	2	10	14	12	0.566682	24
N013	31	1	4	0	10	68	9	2	2	2	10	14	12	0.566682	25
N013	32	1	3	0.0112898	10	68	9	2	2	2	10	14	12	0.566682	26
N013	33	1	3	0.0115393	10	68	9	2	2	2	10	14	12	0.566682	27
N013	34	1	4	0.00420531	10	68	9	2	2	2	10	14	12	0.566682	28
N013	35	1	4	0.0101563	10	68	9	2	2	2	10	14	12	0.566682	29
N013	36	1	3	0.0109329	10	68	9	2	2	2	10	14	12	0.566682	30
N013	37	1	4	0.00941412	10	68	9	2	2	2	10	14	12	0.566682	31
N013	38	1	2	0.046903	10	68	9	2	2	2	10	14	12	0.566682	32
N013	39	1	4	0	10	68	9	2	2	2	10	14	12	0.566682	33
N013	40	1	4	0.0133056	10	68	9	2	2	2	10	14	12	0.566682	34
N014	2	1	1	0.0488696	6	39	29	2	2	2	6	8	11	-1.41624	1
N014	3	1	1	0.0268178	6	39	29	2	1	2	6	8	11	-1.41624	1
N014	4	1	2	0.111008	6	39	29	2	2	2	6	8	11	-1.41624	2
N014	5	1	1	0.0839618	6	39	29	2	1	2	6	8	11	-1.41624	2
N014	6	1	4	0.105905	6	39	29	2	2	2	6	8	11	-1.41624	3
N014	7	1	1	0.0491639	6	39	29	2	2	2	6	8	11	-1.41624	4
N014	8	1	2	0.544621	6	39	29	2	1	2	6	8	11	-1.41624	3
N014	9	1	1	0	6	39	29	2	1	2	6	8	11	-1.41624	4
N014	10	1	2	0.130311	6	39	29	2	2	2	6	8	11	-1.41624	5
N014	11	1	1	1.46279	6	39	29	2	2	2	6	8	11	-1.41624	6
N014	12	3	3	0.106556	6	39	29	2	2	2	6	8	11	-1.41624	7
N014	13	1	1	0.281597	6	39	29	2	1	2	6	8	11	-1.41624	5
N014	14	2	2	0.0549586	6	39	29	2	2	2	6	8	11	-1.41624	8
N014	15	1	1	0.380751	6	39	29	2	1	2	6	8	11	-1.41624	6
N014	16	2	2	0.424804	6	39	29	2	1	2	6	8	11	-1.41624	7
N014	17	3	3	0.25065	6	39	29	2	2	2	6	8	11	-1.41624	9
N014	18	2	2	0.343623	6	39	29	2	2	2	6	8	11	-1.41624	10
N014	19	1	1	0.00553499	6	39	29	2	2	2	6	8	11	-1.41624	11
N014	20	3	3	0.00170623	6	39	29	2	2	2	6	8	11	-1.41624	12
N014	21	4	4	0.366975	6	39	29	2	1	2	6	8	11	-1.41624	8
N014	22	2	2	0.502112	6	39	29	2	2	2	6	8	11	-1.41624	13
N014	23	2	2	0.928321	6	39	29	2	2	2	6	8	11	-1.41624	14
N014	24	3	3	0.345493	6	39	29	2	2	2	6	8	11	-1.41624	15
N014	25	2	2	0.18886	6	39	29	2	2	2	6	8	11	-1.41624	16
N014	26	3	3	0.0831131	6	39	29	2	1	2	6	8	11	-1.41624	9
N014	27	4	4	0.135302	6	39	29	2	2	2	6	8	11	-1.41624	17
N014	28	2	2	0.0683244	6	39	29	2	1	2	6	8	11	-1.41624	10
N014	29	1	1	0.0892132	6	39	29	2	2	2	6	8	11	-1.41624	18
N014	30	3	3	1.56311	6	39	29	2	2	2	6	8	11	-1.41624	19
N014	31	4	4	0.561762	6	39	29	2	2	2	6	8	11	-1.41624	20
N014	32	3	3	0.0719375	6	39	29	2	2	2	6	8	11	-1.41624	21
N014	33	3	3	0.803184	6	39	29	2	2	2	6	8	11	-1.41624	22
N014	34	4	4	0.478693	6	39	29	2	2	2	6	8	11	-1.41624	23
N014	35	4	4	0.0718926	6	39	29	2	1	2	6	8	11	-1.41624	11
N014	36	3	3	0.152071	6	39	29	2	2	2	6	8	11	-1.41624	24
N014	37	4	4	0.0589652	6	39	29	2	1	2	6	8	11	-1.41624	12
N014	38	2	2	0.668324	6	39	29	2	1	2	6	8	11	-1.41624	13
N014	39	4	4	0.0463419	6	39	29	2	2	2	6	8	11	-1.41624	25
N014	40	4	4	1.06201	6	39	29	2	2	2	6	8	11	-1.41624	26
N016	2	1	1	0.409186	4	50	15	2	1	1	4	1	7	-0.6641	1
N016	3	1	1	0.435018	4	50	15	2	2	1	4	1	7	-0.6641	1
N016	4	1	2	0.424451	4	50	15	2	2	1	4	1	7	-0.6641	2
N016	5	1	1	0.0593152	4	50	15	2	2	1	4	1	7	-0.6641	3
N016	6	1	4	0.471199	4	50	15	2	2	1	4	1	7	-0.6641	4
N016	7	2	1	0.0865465	4	50	15	2	2	1	4	1	7	-0.6641	5
N016	8	2	2	0.148181	4	50	15	2	1	1	4	1	7	-0.6641	2
N016	9	2	1	0.191792	4	50	15	2	1	1	4	1	7	-0.6641	3
N016	10	2	2	0.200017	4	50	15	2	2	1	4	1	7	-0.6641	6
N016	11	2	1	0.33443	4	50	15	2	1	1	4	1	7	-0.6641	4
N016	12	1	3	0.290387	4	50	15	2	2	1	4	1	7	-0.6641	7
N016	13	4	1	0.457113	4	50	15	2	1	1	4	1	7	-0.6641	5
N016	14	4	2	0.466981	4	50	15	2	2	1	4	1	7	-0.6641	8
N016	15	2	1	0.327201	4	50	15	2	2	1	4	1	7	-0.6641	9
N016	16	2	2	0.215487	4	50	15	2	1	1	4	1	7	-0.6641	6
N016	17	2	3	0.258142	4	50	15	2	1	1	4	1	7	-0.6641	7
N016	18	1	2	0.394007	4	50	15	2	2	1	4	1	7	-0.6641	10
N016	19	4	1	0.245314	4	50	15	2	2	1	4	1	7	-0.6641	11
N016	20	1	3	0.208758	4	50	15	2	2	1	4	1	7	-0.6641	12
N016	21	4	4	0.253639	4	50	15	2	2	1	4	1	7	-0.6641	13
N016	22	4	2	0.20739	4	50	15	2	2	1	4	1	7	-0.6641	14
N016	23	1	2	0.00943118	4	50	15	2	1	1	4	1	7	-0.6641	8
N016	24	4	3	0.213124	4	50	15	2	1	1	4	1	7	-0.6641	9
N016	25	4	2	0.199225	4	50	15	2	1	1	4	1	7	-0.6641	10
N016	26	4	3	0.324147	4	50	15	2	1	1	4	1	7	-0.6641	11
N016	27	1	4	0.387277	4	50	15	2	2	1	4	1	7	-0.6641	15
N016	28	1	2	0.442109	4	50	15	2	2	1	4	1	7	-0.6641	16
N016	29	1	1	0.101818	4	50	15	2	1	1	4	1	7	-0.6641	12
N016	30	4	3	0.520193	4	50	15	2	1	1	4	1	7	-0.6641	13
N016	31	4	4	0.486198	4	50	15	2	2	1	4	1	7	-0.6641	17
N016	32	4	3	0.269784	4	50	15	2	2	1	4	1	7	-0.6641	18
N016	33	1	3	0.124531	4	50	15	2	2	1	4	1	7	-0.6641	19
N016	34	4	4	0.216151	4	50	15	2	2	1	4	1	7	-0.6641	20
N016	35	1	4	0.115734	4	50	15	2	2	1	4	1	7	-0.6641	21
N016	36	1	3	0.313376	4	50	15	2	1	1	4	1	7	-0.6641	14
N016	37	1	4	0.296188	4	50	15	2	1	1	4	1	7	-0.6641	15
N016	38	1	2	0.151568	4	50	15	2	2	1	4	1	7	-0.6641	22
N016	39	1	4	0.154083	4	50	15	2	2	1	4	1	7	-0.6641	23
N016	40	1	4	0.250269	4	50	15	2	2	1	4	1	7	-0.6641	24
N017	2	4	1	0.168266	1	52	20	1	1	1	1	3	8	-0.527346	1
N017	3	4	1	0.195777	1	52	20	1	1	1	1	3	8	-0.527346	2
N017	4	4	2	0.169602	1	52	20	1	1	1	1	3	8	-0.527346	3
N017	5	4	1	0.0919578	1	52	20	1	1	1	1	3	8	-0.527346	4
N017	6	4	4	0.172657	1	52	20	1	1	1	1	3	8	-0.527346	5
N017	7	4	1	0.177608	1	52	20	1	1	1	1	3	8	-0.527346	6
N017	8	4	2	0.190263	1	52	20	1	1	1	1	3	8	-0.527346	7
N017	9	4	1	0.25169	1	52	20	1	1	1	1	3	8	-0.527346	8
N017	10	4	2	0.300329	1	52	20	1	1	1	1	3	8	-0.527346	9
N017	11	4	1	0.416853	1	52	20	1	2	1	1	3	8	-0.527346	1
N017	12	4	3	0.248532	1	52	20	1	1	1	1	3	8	-0.527346	10
N017	13	4	1	0.287818	1	52	20	1	2	1	1	3	8	-0.527346	2
N017	14	4	2	0.151834	1	52	20	1	1	1	1	3	8	-0.527346	11
N017	15	4	1	0.222902	1	52	20	1	1	1	1	3	8	-0.527346	12
N017	16	4	2	0.173774	1	52	20	1	1	1	1	3	8	-0.527346	13
N017	17	4	3	0.250742	1	52	20	1	1	1	1	3	8	-0.527346	14
N017	18	4	2	0.311936	1	52	20	1	2	1	1	3	8	-0.527346	3
N017	19	4	1	0.0935065	1	52	20	1	1	1	1	3	8	-0.527346	15
N017	20	4	3	0.163787	1	52	20	1	1	1	1	3	8	-0.527346	16
N017	21	4	4	0.119976	1	52	20	1	2	1	1	3	8	-0.527346	4
N017	22	4	2	0.291197	1	52	20	1	1	1	1	3	8	-0.527346	17
N017	23	4	2	0.116924	1	52	20	1	1	1	1	3	8	-0.527346	18
N017	24	4	3	0.318353	1	52	20	1	1	1	1	3	8	-0.527346	19
N017	25	4	2	0.180035	1	52	20	1	2	1	1	3	8	-0.527346	5
N017	26	4	3	0.13264	1	52	20	1	2	1	1	3	8	-0.527346	6
N017	27	4	4	0.327052	1	52	20	1	1	1	1	3	8	-0.527346	20
N017	28	4	2	0.412936	1	52	20	1	1	1	1	3	8	-0.527346	21
N017	29	4	1	0.0779732	1	52	20	1	2	1	1	3	8	-0.527346	7
N017	30	4	3	0.155915	1	52	20	1	2	1	1	3	8	-0.527346	8
N017	31	4	4	0.272871	1	52	20	1	2	1	1	3	8	-0.527346	9
N017	32	4	3	0.363708	1	52	20	1	2	1	1	3	8	-0.527346	10
N017	33	4	3	0.227356	1	52	20	1	1	1	1	3	8	-0.527346	22
N017	34	4	4	0.34147	1	52	20	1	1	1	1	3	8	-0.527346	23
N017	35	4	4	0.138724	1	52	20	1	2	1	1	3	8	-0.527346	11
N017	36	4	3	0.112031	1	52	20	1	1	1	1	3	8	-0.527346	24
N017	37	4	4	0.307156	1	52	20	1	2	1	1	3	8	-0.527346	12
N017	38	4	2	0.251086	1	52	20	1	1	1	1	3	8	-0.527346	25
N017	39	4	4	0.107796	1	52	20	1	1	1	1	3	8	-0.527346	26
N017	40	4	4	0.154068	1	52	20	1	2	1	1	3	8	-0.527346	13
N018	2	1	1	0.0518975	19	88	24	1	2	2	11	10	17	1.93422	1
N018	3	1	1	0.308462	19	88	24	1	2	2	11	10	17	1.93422	2
N018	4	1	2	0.0074742	19	88	24	1	2	2	11	10	17	1.93422	3
N018	5	1	1	0.0164105	19	88	24	1	2	2	11	10	17	1.93422	4
N018	6	1	4	0.0857682	19	88	24	1	2	2	11	10	17	1.93422	5
N018	7	2	1	0.333192	19	88	24	1	2	2	11	10	17	1.93422	6
N018	8	1	2	0.951391	19	88	24	1	1	2	11	10	17	1.93422	1
N018	9	2	1	0.107835	19	88	24	1	2	2	11	10	17	1.93422	7
N018	10	1	2	0.222017	19	88	24	1	1	2	11	10	17	1.93422	2
N018	11	4	1	1.57279	19	88	24	1	2	2	11	10	17	1.93422	8
N018	12	2	3	0.223892	19	88	24	1	1	2	11	10	17	1.93422	3
N018	13	2	1	0.314804	19	88	24	1	2	2	11	10	17	1.93422	9
N018	14	2	2	0.524171	19	88	24	1	2	2	11	10	17	1.93422	10
N018	15	2	1	0.0272082	19	88	24	1	2	2	11	10	17	1.93422	11
N018	16	1	2	0.293723	19	88	24	1	2	2	11	10	17	1.93422	12
N018	17	4	3	0.00927171	19	88	24	1	2	2	11	10	17	1.93422	13
N018	18	1	2	0.142041	19	88	24	1	1	2	11	10	17	1.93422	4
N018	19	1	1	0.593368	19	88	24	1	2	2	11	10	17	1.93422	14
N018	20	1	3	0.577032	19	88	24	1	2	2	11	10	17	1.93422	15
N018	21	1	4	0.0724645	19	88	24	1	2	2	11	10	17	1.93422	16
N018	22	1	2	0.140622	19	88	24	1	2	2	11	10	17	1.93422	17
N018	23	4	2	0.178222	19	88	24	1	2	2	11	10	17	1.93422	18
N018	24	1	3	0.126173	19	88	24	1	2	2	11	10	17	1.93422	19
N018	25	4	2	0.116119	19	88	24	1	1	2	11	10	17	1.93422	5
N018	26	2	3	0.0925358	19	88	24	1	1	2	11	10	17	1.93422	6
N018	27	4	4	0.0444806	19	88	24	1	2	2	11	10	17	1.93422	20
N018	28	2	2	0.298429	19	88	24	1	1	2	11	10	17	1.93422	7
N018	29	2	1	0.262809	19	88	24	1	2	2	11	10	17	1.93422	21
N018	30	1	3	0.256634	19	88	24	1	2	2	11	10	17	1.93422	22
N018	31	1	4	0.868569	19	88	24	1	2	2	11	10	17	1.93422	23
N018	32	4	3	0.863812	19	88	24	1	1	2	11	10	17	1.93422	8
N018	33	1	3	0.490432	19	88	24	1	1	2	11	10	17	1.93422	9
N018	34	3	4	0.0940697	19	88	24	1	1	2	11	10	17	1.93422	10
N018	35	1	4	0.22353	19	88	24	1	2	2	11	10	17	1.93422	24
N018	36	1	3	0.353994	19	88	24	1	1	2	11	10	17	1.93422	11
N018	37	4	4	2.18143	19	88	24	1	1	2	11	10	17	1.93422	12
N018	38	4	2	0.0249224	19	88	24	1	2	2	11	10	17	1.93422	25
N018	39	4	4	0.377835	19	88	24	1	2	2	11	10	17	1.93422	26
N018	40	4	4	0.778576	19	88	24	1	2	2	11	10	17	1.93422	27
N019	2	1	1	0	10	78	38	1	2	2	7	7	17	1.25045	1
N019	3	2	1	0.190171	10	78	38	1	2	2	7	7	17	1.25045	2
N019	4	3	2	0.21664	10	78	38	1	2	2	7	7	17	1.25045	3
N019	5	1	1	0.286245	10	78	38	1	2	2	7	7	17	1.25045	4
N019	6	1	4	0.106689	10	78	38	1	1	2	7	7	17	1.25045	1
N019	7	1	1	0.076187	10	78	38	1	2	2	7	7	17	1.25045	5
N019	8	1	2	0.0811291	10	78	38	1	1	2	7	7	17	1.25045	2
N019	9	3	1	0.0228702	10	78	38	1	2	2	7	7	17	1.25045	6
N019	10	4	2	0.0183602	10	78	38	1	1	2	7	7	17	1.25045	3
N019	11	4	1	0.0777665	10	78	38	1	1	2	7	7	17	1.25045	4
N019	12	3	3	0.316903	10	78	38	1	1	2	7	7	17	1.25045	5
N019	13	1	1	2.33477	10	78	38	1	2	2	7	7	17	1.25045	7
N019	14	1	2	0.546257	10	78	38	1	2	2	7	7	17	1.25045	8
N019	15	4	1	0.025691	10	78	38	1	2	2	7	7	17	1.25045	9
N019	16	4	2	0.0956249	10	78	38	1	2	2	7	7	17	1.25045	10
N019	17	4	3	0.127572	10	78	38	1	1	2	7	7	17	1.25045	6
N019	18	1	2	0.160983	10	78	38	1	1	2	7	7	17	1.25045	7
N019	19	2	1	0.458843	10	78	38	1	2	2	7	7	17	1.25045	11
N019	20	4	3	0.0673819	10	78	38	1	2	2	7	7	17	1.25045	12
N019	21	4	4	0.0884762	10	78	38	1	1	2	7	7	17	1.25045	8
N019	22	1	2	0.0498029	10	78	38	1	2	2	7	7	17	1.25045	13
N019	23	2	2	0.550258	10	78	38	1	1	2	7	7	17	1.25045	9
N019	24	1	3	0.65606	10	78	38	1	2	2	7	7	17	1.25045	14
N019	25	2	2	0.0969808	10	78	38	1	2	2	7	7	17	1.25045	15
N019	26	3	3	1.09781	10	78	38	1	1	2	7	7	17	1.25045	10
N019	27	1	4	0.0280665	10	78	38	1	2	2	7	7	17	1.25045	16
N019	28	1	2	0.207794	10	78	38	1	1	2	7	7	17	1.25045	11
N019	29	2	1	0.104923	10	78	38	1	2	2	7	7	17	1.25045	17
N019	30	1	3	0.390892	10	78	38	1	2	2	7	7	17	1.25045	18
N019	31	4	4	0.0996583	10	78	38	1	2	2	7	7	17	1.25045	19
N019	32	1	3	0.0604551	10	78	38	1	2	2	7	7	17	1.25045	20
N019	33	4	3	0.558358	10	78	38	1	2	2	7	7	17	1.25045	21
N019	34	1	4	0.0811191	10	78	38	1	2	2	7	7	17	1.25045	22
N019	35	1	4	0.941613	10	78	38	1	2	2	7	7	17	1.25045	23
N019	36	2	3	0.604955	10	78	38	1	1	2	7	7	17	1.25045	12
N019	37	4	4	0.105022	10	78	38	1	2	2	7	7	17	1.25045	24
N019	38	4	2	0.0392025	10	78	38	1	1	2	7	7	17	1.25045	13
N019	39	2	4	0.14971	10	78	38	1	2	2	7	7	17	1.25045	25
N019	40	4	4	1.67574	10	78	38	1	2	2	7	7	17	1.25045	26
N021	2	1	1	0.264662	5	52	12	2	2	2	5	6	10	-0.527346	1
N021	3	1	1	0.289427	5	52	12	2	2	2	5	6	10	-0.527346	2
N021	4	2	2	0.111157	5	52	12	2	2	2	5	6	10	-0.527346	3
N021	5	1	1	0.308172	5	52	12	2	1	2	5	6	10	-0.527346	1
N021	6	3	4	0.140423	5	52	12	2	2	2	5	6	10	-0.527346	4
N021	7	1	1	0.386493	5	52	12	2	2	2	5	6	10	-0.527346	5
N021	8	2	2	0.466212	5	52	12	2	2	2	5	6	10	-0.527346	6
N021	9	1	1	0.292105	5	52	12	2	2	2	5	6	10	-0.527346	7
N021	10	2	2	0.166317	5	52	12	2	1	2	5	6	10	-0.527346	2
N021	11	1	1	0.194161	5	52	12	2	2	2	5	6	10	-0.527346	8
N021	12	3	3	0.0386169	5	52	12	2	2	2	5	6	10	-0.527346	9
N021	13	1	1	0.443459	5	52	12	2	2	2	5	6	10	-0.527346	10
N021	14	2	2	0.0689395	5	52	12	2	2	2	5	6	10	-0.527346	11
N021	15	1	1	0.0739707	5	52	12	2	2	2	5	6	10	-0.527346	12
N021	16	2	2	0.0461582	5	52	12	2	1	2	5	6	10	-0.527346	3
N021	17	3	3	0.192814	5	52	12	2	2	2	5	6	10	-0.527346	13
N021	18	2	2	0.238484	5	52	12	2	2	2	5	6	10	-0.527346	14
N021	19	1	1	0.139899	5	52	12	2	1	2	5	6	10	-0.527346	4
N021	20	3	3	0.606041	5	52	12	2	2	2	5	6	10	-0.527346	15
N021	21	4	4	0.0210515	5	52	12	2	2	2	5	6	10	-0.527346	16
N021	22	2	2	0.904961	5	52	12	2	2	2	5	6	10	-0.527346	17
N021	23	2	2	0.176219	5	52	12	2	2	2	5	6	10	-0.527346	18
N021	24	3	3	1.59969	5	52	12	2	2	2	5	6	10	-0.527346	19
N021	25	2	2	0.24122	5	52	12	2	2	2	5	6	10	-0.527346	20
N021	26	3	3	0.0873072	5	52	12	2	2	2	5	6	10	-0.527346	21
N021	27	4	4	0	5	52	12	2	2	2	5	6	10	-0.527346	22
N021	28	2	2	0.0435962	5	52	12	2	1	2	5	6	10	-0.527346	5
N021	29	1	1	0.141703	5	52	12	2	2	2	5	6	10	-0.527346	23
N021	30	1	3	0.541358	5	52	12	2	2	2	5	6	10	-0.527346	24
N021	31	2	4	0.390037	5	52	12	2	2	2	5	6	10	-0.527346	25
N021	32	2	3	0.117666	5	52	12	2	2	2	5	6	10	-0.527346	26
N021	33	2	3	0.427865	5	52	12	2	1	2	5	6	10	-0.527346	6
N021	34	2	4	0.108846	5	52	12	2	2	2	5	6	10	-0.527346	27
N021	35	4	4	0.137196	5	52	12	2	2	2	5	6	10	-0.527346	28
N021	36	2	3	0.06175	5	52	12	2	1	2	5	6	10	-0.527346	7
N021	37	3	4	0.27395	5	52	12	2	2	2	5	6	10	-0.527346	29
N021	38	1	2	0.463611	5	52	12	2	1	2	5	6	10	-0.527346	8
N021	39	3	4	1.14141	5	52	12	2	2	2	5	6	10	-0.527346	30
N021	40	3	4	0.0820822	5	52	12	2	2	2	5	6	10	-0.527346	31
N024	2	1	1	0.116118	6	51	19	2	2	2	5	12	13	-0.595723	1
N024	3	1	1	0.227377	6	51	19	2	1	2	5	12	13	-0.595723	1
N024	4	1	2	0.383542	6	51	19	2	2	2	5	12	13	-0.595723	2
N024	5	2	1	0.391707	6	51	19	2	2	2	5	12	13	-0.595723	3
N024	6	1	4	0.137714	6	51	19	2	2	2	5	12	13	-0.595723	4
N024	7	1	1	0.0718003	6	51	19	2	2	2	5	12	13	-0.595723	5
N024	8	1	2	0.163866	6	51	19	2	2	2	5	12	13	-0.595723	6
N024	9	1	1	0.269522	6	51	19	2	2	2	5	12	13	-0.595723	7
N024	10	2	2	0.335179	6	51	19	2	2	2	5	12	13	-0.595723	8
N024	11	1	1	0.284332	6	51	19	2	1	2	5	12	13	-0.595723	2
N024	12	4	3	0.18752	6	51	19	2	2	2	5	12	13	-0.595723	9
N024	13	1	1	0.471147	6	51	19	2	2	2	5	12	13	-0.595723	10
N024	14	1	2	0.35536	6	51	19	2	1	2	5	12	13	-0.595723	3
N024	15	1	1	0.475595	6	51	19	2	2	2	5	12	13	-0.595723	11
N024	16	3	2	0.493485	6	51	19	2	2	2	5	12	13	-0.595723	12
N024	17	4	3	0.149072	6	51	19	2	2	2	5	12	13	-0.595723	13
N024	18	3	2	0.130505	6	51	19	2	2	2	5	12	13	-0.595723	14
N024	19	1	1	0.290153	6	51	19	2	2	2	5	12	13	-0.595723	15
N024	20	1	3	0.281576	6	51	19	2	2	2	5	12	13	-0.595723	16
N024	21	1	4	0.360503	6	51	19	2	2	2	5	12	13	-0.595723	17
N024	22	2	2	0.141694	6	51	19	2	1	2	5	12	13	-0.595723	4
N024	23	2	2	0.178541	6	51	19	2	1	2	5	12	13	-0.595723	5
N024	24	2	3	0.369753	6	51	19	2	2	2	5	12	13	-0.595723	18
N024	25	3	2	0.0489999	6	51	19	2	2	2	5	12	13	-0.595723	19
N024	26	1	3	0.228258	6	51	19	2	2	2	5	12	13	-0.595723	20
N024	27	2	4	0.276086	6	51	19	2	2	2	5	12	13	-0.595723	21
N024	28	2	2	0.132356	6	51	19	2	1	2	5	12	13	-0.595723	6
N024	29	2	1	0.301273	6	51	19	2	2	2	5	12	13	-0.595723	22
N024	30	3	3	0.0210483	6	51	19	2	2	2	5	12	13	-0.595723	23
N024	31	3	4	0.211278	6	51	19	2	2	2	5	12	13	-0.595723	24
N024	32	1	3	0.375746	6	51	19	2	2	2	5	12	13	-0.595723	25
N024	33	1	3	0.343059	6	51	19	2	2	2	5	12	13	-0.595723	26
N024	34	3	4	0.281068	6	51	19	2	2	2	5	12	13	-0.595723	27
N024	35	1	4	0.328613	6	51	19	2	2	2	5	12	13	-0.595723	28
N024	36	1	3	0.187591	6	51	19	2	2	2	5	12	13	-0.595723	29
N024	37	1	4	0.203887	6	51	19	2	2	2	5	12	13	-0.595723	30
N024	38	2	2	0.224431	6	51	19	2	2	2	5	12	13	-0.595723	31
N024	39	2	4	0.209426	6	51	19	2	2	2	5	12	13	-0.595723	32
N024	40	4	4	0.0979436	6	51	19	2	2	2	5	12	13	-0.595723	33
N025	2	2	1	0.566235	6	51	19	1	2	2	5	9	8	-0.595723	1
N025	3	4	1	2.32563	6	51	19	1	1	2	5	9	8	-0.595723	1
N025	4	2	2	0.434924	6	51	19	1	1	2	5	9	8	-0.595723	2
N025	5	4	1	0.791941	6	51	19	1	2	2	5	9	8	-0.595723	2
N025	6	4	4	0.103248	6	51	19	1	2	2	5	9	8	-0.595723	3
N025	7	4	1	0.227193	6	51	19	1	1	2	5	9	8	-0.595723	3
N025	8	2	2	0.193953	6	51	19	1	1	2	5	9	8	-0.595723	4
N025	9	4	1	0.0545075	6	51	19	1	1	2	5	9	8	-0.595723	5
N025	10	3	2	0.375035	6	51	19	1	1	2	5	9	8	-0.595723	6
N025	11	2	1	0.688029	6	51	19	1	1	2	5	9	8	-0.595723	7
N025	12	2	3	0.102619	6	51	19	1	2	2	5	9	8	-0.595723	4
N025	13	4	1	0.939678	6	51	19	1	2	2	5	9	8	-0.595723	5
N025	14	4	2	0.519808	6	51	19	1	1	2	5	9	8	-0.595723	8
N025	15	4	1	1.04251	6	51	19	1	1	2	5	9	8	-0.595723	9
N025	16	4	2	0.0133731	6	51	19	1	2	2	5	9	8	-0.595723	6
N025	17	4	3	0.299658	6	51	19	1	1	2	5	9	8	-0.595723	10
N025	18	4	2	0.134178	6	51	19	1	1	2	5	9	8	-0.595723	11
N025	19	4	1	0.134934	6	51	19	1	1	2	5	9	8	-0.595723	12
N025	20	4	3	0.0612111	6	51	19	1	2	2	5	9	8	-0.595723	7
N025	21	4	4	0.2617	6	51	19	1	1	2	5	9	8	-0.595723	13
N025	22	4	2	0.356262	6	51	19	1	2	2	5	9	8	-0.595723	8
N025	23	4	2	0.827971	6	51	19	1	1	2	5	9	8	-0.595723	14
N025	24	4	3	0.494573	6	51	19	1	2	2	5	9	8	-0.595723	9
N025	25	4	2	0.390554	6	51	19	1	2	2	5	9	8	-0.595723	10
N025	26	4	3	0.140737	6	51	19	1	2	2	5	9	8	-0.595723	11
N025	27	4	4	0.350874	6	51	19	1	1	2	5	9	8	-0.595723	15
N025	28	4	2	0	6	51	19	1	2	2	5	9	8	-0.595723	12
N025	29	4	1	0.59881	6	51	19	1	2	2	5	9	8	-0.595723	13
N025	30	4	3	0.55312	6	51	19	1	2	2	5	9	8	-0.595723	14
N025	31	4	4	2.10734	6	51	19	1	1	2	5	9	8	-0.595723	16
N025	32	4	3	0.0859419	6	51	19	1	2	2	5	9	8	-0.595723	15
N025	33	1	3	0.575197	6	51	19	1	2	2	5	9	8	-0.595723	16
N025	34	1	4	1.27115	6	51	19	1	1	2	5	9	8	-0.595723	17
N025	35	4	4	0.356702	6	51	19	1	2	2	5	9	8	-0.595723	17
N025	36	4	3	0.151586	6	51	19	1	2	2	5	9	8	-0.595723	18
N025	37	4	4	1.00359	6	51	19	1	2	2	5	9	8	-0.595723	19
N025	38	4	2	0.411571	6	51	19	1	2	2	5	9	8	-0.595723	20
N025	39	4	4	0.110673	6	51	19	1	1	2	5	9	8	-0.595723	18
N025	40	2	4	0	6	51	19	1	2	2	5	9	8	-0.595723	21
N026	2	1	1	0.596474	1	44	31	1	2	2	1	11	16	-1.07436	1
N026	3	1	1	0.529915	1	44	31	1	1	2	1	11	16	-1.07436	1
N026	4	1	2	0.51034	1	44	31	1	2	2	1	11	16	-1.07436	2
N026	5	1	1	0.642802	1	44	31	1	2	2	1	11	16	-1.07436	3
N026	6	1	4	0.586374	1	44	31	1	2	2	1	11	16	-1.07436	4
N026	7	1	1	0.466462	1	44	31	1	2	2	1	11	16	-1.07436	5
N026	8	1	2	0.502303	1	44	31	1	2	2	1	11	16	-1.07436	6
N026	9	1	1	0.389202	1	44	31	1	1	2	1	11	16	-1.07436	2
N026	10	4	2	0.564805	1	44	31	1	2	2	1	11	16	-1.07436	7
N026	11	3	1	0.501082	1	44	31	1	2	2	1	11	16	-1.07436	8
N026	12	3	3	0.797078	1	44	31	1	1	2	1	11	16	-1.07436	3
N026	13	2	1	0.646375	1	44	31	1	1	2	1	11	16	-1.07436	4
N026	14	1	2	0.483446	1	44	31	1	2	2	1	11	16	-1.07436	9
N026	15	1	1	0.690681	1	44	31	1	1	2	1	11	16	-1.07436	5
N026	16	1	2	0.144969	1	44	31	1	2	2	1	11	16	-1.07436	10
N026	17	4	3	0.256868	1	44	31	1	2	2	1	11	16	-1.07436	11
N026	18	4	2	0.695309	1	44	31	1	1	2	1	11	16	-1.07436	6
N026	19	3	1	0.435535	1	44	31	1	2	2	1	11	16	-1.07436	12
N026	20	3	3	0.51176	1	44	31	1	2	2	1	11	16	-1.07436	13
N026	21	4	4	0.884542	1	44	31	1	1	2	1	11	16	-1.07436	7
N026	22	3	2	0.511827	1	44	31	1	1	2	1	11	16	-1.07436	8
N026	23	2	2	0.423656	1	44	31	1	2	2	1	11	16	-1.07436	14
N026	24	2	3	0.507386	1	44	31	1	2	2	1	11	16	-1.07436	15
N026	25	2	2	0.52801	1	44	31	1	1	2	1	11	16	-1.07436	9
N026	26	2	3	0.408469	1	44	31	1	2	2	1	11	16	-1.07436	16
N026	27	4	4	0.307683	1	44	31	1	2	2	1	11	16	-1.07436	17
N026	28	4	2	0.567791	1	44	31	1	2	2	1	11	16	-1.07436	18
N026	29	4	1	0.452381	1	44	31	1	2	2	1	11	16	-1.07436	19
N026	30	4	3	0.348175	1	44	31	1	1	2	1	11	16	-1.07436	10
N026	31	4	4	0.714621	1	44	31	1	2	2	1	11	16	-1.07436	20
N026	32	4	3	0.562728	1	44	31	1	2	2	1	11	16	-1.07436	21
N026	33	4	3	0.427884	1	44	31	1	2	2	1	11	16	-1.07436	22
N026	34	4	4	0.428289	1	44	31	1	2	2	1	11	16	-1.07436	23
N026	35	4	4	0.219584	1	44	31	1	2	2	1	11	16	-1.07436	24
N026	36	1	3	0.309584	1	44	31	1	1	2	1	11	16	-1.07436	11
N026	37	1	4	0.39902	1	44	31	1	2	2	1	11	16	-1.07436	25
N026	38	4	2	0.462791	1	44	31	1	2	2	1	11	16	-1.07436	26
N026	39	4	4	0.678291	1	44	31	1	2	2	1	11	16	-1.07436	27
N026	40	4	4	0.483161	1	44	31	1	2	2	1	11	16	-1.07436	28
N027	2	2	1	0	2	43	2	2	1	2	2	4	9	-1.14274	1
N027	3	2	1	0.199374	2	43	2	2	1	2	2	4	9	-1.14274	2
N027	4	2	2	0.876833	2	43	2	2	1	2	2	4	9	-1.14274	3
N027	5	1	1	0.0460167	2	43	2	2	2	2	2	4	9	-1.14274	1
N027	6	2	4	0	2	43	2	2	2	2	2	4	9	-1.14274	2
N027	7	2	1	0.166441	2	43	2	2	1	2	2	4	9	-1.14274	4
N027	8	2	2	0.434416	2	43	2	2	1	2	2	4	9	-1.14274	5
N027	9	2	1	0.320881	2	43	2	2	2	2	2	4	9	-1.14274	3
N027	10	2	2	0.00576606	2	43	2	2	1	2	2	4	9	-1.14274	6
N027	11	1	1	0.491793	2	43	2	2	2	2	2	4	9	-1.14274	4
N027	12	1	3	0.725122	2	43	2	2	2	2	2	4	9	-1.14274	5
N027	13	2	1	0.166006	2	43	2	2	2	2	2	4	9	-1.14274	6
N027	14	2	2	0.168893	2	43	2	2	1	2	2	4	9	-1.14274	7
N027	15	2	1	0.161351	2	43	2	2	2	2	2	4	9	-1.14274	7
N027	16	1	2	0.241861	2	43	2	2	2	2	2	4	9	-1.14274	8
N027	17	1	3	0.178224	2	43	2	2	2	2	2	4	9	-1.14274	9
N027	18	1	2	0.22024	2	43	2	2	1	2	2	4	9	-1.14274	8
N027	19	1	1	1.32459	2	43	2	2	2	2	2	4	9	-1.14274	10
N027	20	2	3	0.20137	2	43	2	2	2	2	2	4	9	-1.14274	11
N027	21	2	4	0.31318	2	43	2	2	2	2	2	4	9	-1.14274	12
N027	22	2	2	0.266734	2	43	2	2	2	2	2	4	9	-1.14274	13
N027	23	2	2	1.90951	2	43	2	2	2	2	2	4	9	-1.14274	14
N027	24	2	3	0.0672815	2	43	2	2	1	2	2	4	9	-1.14274	9
N027	25	2	2	0.402495	2	43	2	2	2	2	2	4	9	-1.14274	15
N027	26	2	3	0	2	43	2	2	2	2	2	4	9	-1.14274	16
N027	27	2	4	0.0966719	2	43	2	2	2	2	2	4	9	-1.14274	17
N027	28	2	2	0.219824	2	43	2	2	2	2	2	4	9	-1.14274	18
N027	29	2	1	0.0830237	2	43	2	2	1	2	2	4	9	-1.14274	10
N027	30	2	3	0.00642322	2	43	2	2	2	2	2	4	9	-1.14274	19
N027	31	2	4	0.162293	2	43	2	2	2	2	2	4	9	-1.14274	20
N027	32	1	3	0.331348	2	43	2	2	2	2	2	4	9	-1.14274	21
N027	33	2	3	0.826069	2	43	2	2	1	2	2	4	9	-1.14274	11
N027	34	2	4	0.141669	2	43	2	2	2	2	2	4	9	-1.14274	22
N027	35	2	4	0.0231865	2	43	2	2	2	2	2	4	9	-1.14274	23
N027	36	2	3	0.195033	2	43	2	2	2	2	2	4	9	-1.14274	24
N027	37	2	4	0.207923	2	43	2	2	2	2	2	4	9	-1.14274	25
N027	38	2	2	0.155654	2	43	2	2	2	2	2	4	9	-1.14274	26
N027	39	2	4	0.84104	2	43	2	2	2	2	2	4	9	-1.14274	27
N027	40	2	4	0.608641	2	43	2	2	2	2	2	4	9	-1.14274	28
N028	2	4	1	0.769516	5	54	8	2	1	2	5	4	4	-0.390593	1
N028	3	4	1	0.946064	5	54	8	2	2	2	5	4	4	-0.390593	1
N028	4	4	2	0.320529	5	54	8	2	1	2	5	4	4	-0.390593	2
N028	5	4	1	1.08497	5	54	8	2	1	2	5	4	4	-0.390593	3
N028	6	4	4	0.507074	5	54	8	2	2	2	5	4	4	-0.390593	2
N028	7	4	1	0.708453	5	54	8	2	1	2	5	4	4	-0.390593	4
N028	8	4	2	0.83677	5	54	8	2	2	2	5	4	4	-0.390593	3
N028	9	4	1	0.035262	5	54	8	2	1	2	5	4	4	-0.390593	5
N028	10	4	2	0.518424	5	54	8	2	1	2	5	4	4	-0.390593	6
N028	11	4	1	0.327549	5	54	8	2	2	2	5	4	4	-0.390593	4
N028	12	4	3	0	5	54	8	2	1	2	5	4	4	-0.390593	7
N028	13	4	1	0.0385197	5	54	8	2	2	2	5	4	4	-0.390593	5
N028	14	4	2	0.0967998	5	54	8	2	1	2	5	4	4	-0.390593	8
N028	15	4	1	0.053335	5	54	8	2	1	2	5	4	4	-0.390593	9
N028	16	4	2	0.378195	5	54	8	2	1	2	5	4	4	-0.390593	10
N028	17	4	3	0.14386	5	54	8	2	1	2	5	4	4	-0.390593	11
N028	18	4	2	1.68793	5	54	8	2	2	2	5	4	4	-0.390593	6
N028	19	4	1	0	5	54	8	2	2	2	5	4	4	-0.390593	7
N028	20	4	3	0.223749	5	54	8	2	1	2	5	4	4	-0.390593	12
N028	21	4	4	0.0527482	5	54	8	2	2	2	5	4	4	-0.390593	8
N028	22	4	2	0.424596	5	54	8	2	2	2	5	4	4	-0.390593	9
N028	23	4	2	0.0346371	5	54	8	2	2	2	5	4	4	-0.390593	10
N028	24	4	3	2.21809	5	54	8	2	1	2	5	4	4	-0.390593	13
N028	25	4	2	0.665835	5	54	8	2	1	2	5	4	4	-0.390593	14
N028	26	4	3	1.98295	5	54	8	2	2	2	5	4	4	-0.390593	11
N028	27	4	4	0.327712	5	54	8	2	2	2	5	4	4	-0.390593	12
N028	28	4	2	1.9232	5	54	8	2	1	2	5	4	4	-0.390593	15
N028	29	4	1	0.125498	5	54	8	2	1	2	5	4	4	-0.390593	16
N028	30	4	3	0.511839	5	54	8	2	1	2	5	4	4	-0.390593	17
N028	31	4	4	0.0214866	5	54	8	2	2	2	5	4	4	-0.390593	13
N028	32	4	3	0.0829285	5	54	8	2	2	2	5	4	4	-0.390593	14
N028	33	4	3	0.0557043	5	54	8	2	2	2	5	4	4	-0.390593	15
N028	34	4	4	0	5	54	8	2	2	2	5	4	4	-0.390593	16
N028	35	4	4	0.158326	5	54	8	2	2	2	5	4	4	-0.390593	17
N028	36	4	3	0.00968641	5	54	8	2	2	2	5	4	4	-0.390593	18
N028	37	4	4	0.139357	5	54	8	2	1	2	5	4	4	-0.390593	18
N028	38	4	2	0	5	54	8	2	1	2	5	4	4	-0.390593	19
N028	39	4	4	0.478657	5	54	8	2	2	2	5	4	4	-0.390593	19
N028	40	4	4	0.871009	5	54	8	2	2	2	5	4	4	-0.390593	20
N029	2	2	1	0.00233828	8	65	17	2	1	1	8	17	10	0.361552	1
N029	3	3	1	0.000964075	8	65	17	2	1	1	8	17	10	0.361552	2
N029	4	4	2	0.00803599	8	65	17	2	1	1	8	17	10	0.361552	3
N029	5	1	1	0.00737478	8	65	17	2	1	1	8	17	10	0.361552	4
N029	6	2	4	0.00519208	8	65	17	2	2	1	8	17	10	0.361552	1
N029	7	1	1	0.00823047	8	65	17	2	2	1	8	17	10	0.361552	2
N029	8	3	2	0.00597739	8	65	17	2	1	1	8	17	10	0.361552	5
N029	9	2	1	0.0018702	8	65	17	2	1	1	8	17	10	0.361552	6
N029	10	1	2	0.00152116	8	65	17	2	2	1	8	17	10	0.361552	3
N029	11	3	1	0.000373083	8	65	17	2	2	1	8	17	10	0.361552	4
N029	12	2	3	0.00107929	8	65	17	2	2	1	8	17	10	0.361552	5
N029	13	4	1	0.00467383	8	65	17	2	1	1	8	17	10	0.361552	7
N029	14	2	2	0.00493526	8	65	17	2	1	1	8	17	10	0.361552	8
N029	15	1	1	0.00750655	8	65	17	2	2	1	8	17	10	0.361552	6
N029	16	3	2	0.00320965	8	65	17	2	2	1	8	17	10	0.361552	7
N029	17	4	3	0	8	65	17	2	2	1	8	17	10	0.361552	8
N029	18	1	2	0.00243273	8	65	17	2	1	1	8	17	10	0.361552	9
N029	19	2	1	0.00987163	8	65	17	2	2	1	8	17	10	0.361552	9
N029	20	3	3	0.00422413	8	65	17	2	2	1	8	17	10	0.361552	10
N029	21	4	4	0.00388811	8	65	17	2	1	1	8	17	10	0.361552	10
N029	22	1	2	0.00207027	8	65	17	2	2	1	8	17	10	0.361552	11
N029	23	3	2	0.00198327	8	65	17	2	2	1	8	17	10	0.361552	12
N029	24	1	3	0.0040591	8	65	17	2	2	1	8	17	10	0.361552	13
N029	25	2	2	0.00327134	8	65	17	2	2	1	8	17	10	0.361552	14
N029	26	4	3	0.012103	8	65	17	2	2	1	8	17	10	0.361552	15
N029	27	3	4	0.00615051	8	65	17	2	1	1	8	17	10	0.361552	11
N029	28	3	2	0.00289847	8	65	17	2	2	1	8	17	10	0.361552	16
N029	29	4	1	0.00317447	8	65	17	2	2	1	8	17	10	0.361552	17
N029	30	3	3	0.0412115	8	65	17	2	1	1	8	17	10	0.361552	12
N029	31	1	4	0.00208735	8	65	17	2	2	1	8	17	10	0.361552	18
N029	32	2	3	0.0125642	8	65	17	2	1	1	8	17	10	0.361552	13
N029	33	4	3	0.00656515	8	65	17	2	1	1	8	17	10	0.361552	14
N029	34	1	4	0.00129713	8	65	17	2	2	1	8	17	10	0.361552	19
N029	35	3	4	0.00215681	8	65	17	2	2	1	8	17	10	0.361552	20
N029	36	4	3	0.021645	8	65	17	2	2	1	8	17	10	0.361552	21
N029	37	1	4	0.00992898	8	65	17	2	2	1	8	17	10	0.361552	22
N029	38	3	2	0.00167213	8	65	17	2	1	1	8	17	10	0.361552	15
N029	39	2	4	0.00297801	8	65	17	2	1	1	8	17	10	0.361552	16
N029	40	4	4	0.00542285	8	65	17	2	2	1	8	17	10	0.361552	23
N031	2	1	1	1.13208	8	56	11	1	1	1	6	7	3	-0.253839	1
N031	3	1	1	0.696888	8	56	11	1	2	1	6	7	3	-0.253839	1
N031	4	2	2	0.274173	8	56	11	1	2	1	6	7	3	-0.253839	2
N031	5	1	1	0.0548746	8	56	11	1	2	1	6	7	3	-0.253839	3
N031	6	3	4	0.387963	8	56	11	1	2	1	6	7	3	-0.253839	4
N031	7	2	1	0	8	56	11	1	1	1	6	7	3	-0.253839	2
N031	8	4	2	0.36838	8	56	11	1	1	1	6	7	3	-0.253839	3
N031	9	1	1	0	8	56	11	1	2	1	6	7	3	-0.253839	5
N031	10	2	2	0.007921	8	56	11	1	2	1	6	7	3	-0.253839	6
N031	11	1	1	0.0462117	8	56	11	1	1	1	6	7	3	-0.253839	4
N031	12	1	3	0.140639	8	56	11	1	2	1	6	7	3	-0.253839	7
N031	13	3	1	0.939818	8	56	11	1	1	1	6	7	3	-0.253839	5
N031	14	2	2	0.212095	8	56	11	1	2	1	6	7	3	-0.253839	8
N031	15	1	1	0.265373	8	56	11	1	2	1	6	7	3	-0.253839	9
N031	16	4	2	0.168524	8	56	11	1	2	1	6	7	3	-0.253839	10
N031	17	3	3	0.175042	8	56	11	1	1	1	6	7	3	-0.253839	6
N031	18	2	2	0.916316	8	56	11	1	2	1	6	7	3	-0.253839	11
N031	19	2	1	0.00556839	8	56	11	1	2	1	6	7	3	-0.253839	12
N031	20	3	3	0.0148095	8	56	11	1	2	1	6	7	3	-0.253839	13
N031	21	4	4	0.257625	8	56	11	1	1	1	6	7	3	-0.253839	7
N031	22	1	2	0.0651362	8	56	11	1	1	1	6	7	3	-0.253839	8
N031	23	2	2	0.0500688	8	56	11	1	2	1	6	7	3	-0.253839	14
N031	24	3	3	0.183052	8	56	11	1	2	1	6	7	3	-0.253839	15
N031	25	2	2	0.399718	8	56	11	1	2	1	6	7	3	-0.253839	16
N031	26	3	3	0.0572705	8	56	11	1	1	1	6	7	3	-0.253839	9
N031	27	4	4	0.233433	8	56	11	1	1	1	6	7	3	-0.253839	10
N031	28	1	2	2.23484	8	56	11	1	1	1	6	7	3	-0.253839	11
N031	29	2	1	1.13008	8	56	11	1	1	1	6	7	3	-0.253839	12
N031	30	3	3	1.81653	8	56	11	1	2	1	6	7	3	-0.253839	17
N031	31	4	4	0.133267	8	56	11	1	1	1	6	7	3	-0.253839	13
N031	32	3	3	0	8	56	11	1	2	1	6	7	3	-0.253839	18
N031	33	2	3	0.0408292	8	56	11	1	2	1	6	7	3	-0.253839	19
N031	34	4	4	0.0524014	8	56	11	1	1	1	6	7	3	-0.253839	14
N031	35	4	4	0.0365891	8	56	11	1	2	1	6	7	3	-0.253839	20
N031	36	1	3	0.107273	8	56	11	1	2	1	6	7	3	-0.253839	21
N031	37	3	4	2.17885	8	56	11	1	1	1	6	7	3	-0.253839	15
N031	38	2	2	0.498456	8	56	11	1	2	1	6	7	3	-0.253839	22
N031	39	4	4	0.478655	8	56	11	1	2	1	6	7	3	-0.253839	23
N031	40	4	4	0.0159508	8	56	11	1	2	1	6	7	3	-0.253839	24
N032	2	1	1	0.0861562	6	45	4	2	2	2	6	10	3	-1.00598	1
N032	3	2	1	0.075989	6	45	4	2	2	2	6	10	3	-1.00598	2
N032	4	1	2	0.116857	6	45	4	2	1	2	6	10	3	-1.00598	1
N032	5	4	1	0.00723354	6	45	4	2	2	2	6	10	3	-1.00598	3
N032	6	4	4	0.102354	6	45	4	2	2	2	6	10	3	-1.00598	4
N032	7	4	1	0.180846	6	45	4	2	2	2	6	10	3	-1.00598	5
N032	8	1	2	0.338073	6	45	4	2	1	2	6	10	3	-1.00598	2
N032	9	1	1	0.0189076	6	45	4	2	1	2	6	10	3	-1.00598	3
N032	10	1	2	0.025251	6	45	4	2	2	2	6	10	3	-1.00598	6
N032	11	2	1	0.179475	6	45	4	2	2	2	6	10	3	-1.00598	7
N032	12	3	3	0.0699146	6	45	4	2	1	2	6	10	3	-1.00598	4
N032	13	3	1	0.0112647	6	45	4	2	2	2	6	10	3	-1.00598	8
N032	14	3	2	0.517943	6	45	4	2	1	2	6	10	3	-1.00598	5
N032	15	3	1	0.0605653	6	45	4	2	1	2	6	10	3	-1.00598	6
N032	16	1	2	0.0634392	6	45	4	2	2	2	6	10	3	-1.00598	9
N032	17	1	3	3.60772	6	45	4	2	1	2	6	10	3	-1.00598	7
N032	18	1	2	0	6	45	4	2	2	2	6	10	3	-1.00598	10
N032	19	1	1	0.0128241	6	45	4	2	2	2	6	10	3	-1.00598	11
N032	20	1	3	0.00836333	6	45	4	2	2	2	6	10	3	-1.00598	12
N032	21	1	4	0.12216	6	45	4	2	2	2	6	10	3	-1.00598	13
N032	22	4	2	0.703167	6	45	4	2	2	2	6	10	3	-1.00598	14
N032	23	4	2	0.598089	6	45	4	2	1	2	6	10	3	-1.00598	8
N032	24	4	3	0.178538	6	45	4	2	1	2	6	10	3	-1.00598	9
N032	25	2	2	0.32376	6	45	4	2	2	2	6	10	3	-1.00598	15
N032	26	2	3	0.0104412	6	45	4	2	2	2	6	10	3	-1.00598	16
N032	27	3	4	0.0664742	6	45	4	2	2	2	6	10	3	-1.00598	17
N032	28	1	2	0	6	45	4	2	1	2	6	10	3	-1.00598	10
N032	29	1	1	1.03616	6	45	4	2	2	2	6	10	3	-1.00598	18
N032	30	4	3	0.649633	6	45	4	2	2	2	6	10	3	-1.00598	19
N032	31	4	4	0.0405204	6	45	4	2	2	2	6	10	3	-1.00598	20
N032	32		3		6	45	4	2	2	2	6	10	3	-1.00598	21
N032	33	1	3	0.185411	6	45	4	2	2	2	6	10	3	-1.00598	22
N032	34	1	4	0.158005	6	45	4	2	2	2	6	10	3	-1.00598	23
N032	35	1	4	0.0783695	6	45	4	2	2	2	6	10	3	-1.00598	24
N032	36	4	3	0.173446	6	45	4	2	2	2	6	10	3	-1.00598	25
N032	37	4	4	0.0784046	6	45	4	2	2	2	6	10	3	-1.00598	26
N032	38	4	2	0.0681105	6	45	4	2	2	2	6	10	3	-1.00598	27
N032	39	4	4	0.210846	6	45	4	2	2	2	6	10	3	-1.00598	28
N032	40	2	4	2.61403	6	45	4	2	1	2	6	10	3	-1.00598	11
N033	2	4	1	0.311897	14	67	24	2	1	1	11	17	18	0.498305	1
N033	3	3	1	0.611585	14	67	24	2	1	1	11	17	18	0.498305	2
N033	4	4	2	0.369491	14	67	24	2	1	1	11	17	18	0.498305	3
N033	5	2	1	0.127647	14	67	24	2	1	1	11	17	18	0.498305	4
N033	6	4	4	0.175712	14	67	24	2	1	1	11	17	18	0.498305	5
N033	7	4	1	0.291237	14	67	24	2	2	1	11	17	18	0.498305	1
N033	8	2	2	0.112432	14	67	24	2	1	1	11	17	18	0.498305	6
N033	9	2	1	0.089386	14	67	24	2	2	1	11	17	18	0.498305	2
N033	10	1	2	0.0448301	14	67	24	2	2	1	11	17	18	0.498305	3
N033	11	1	1	0.171913	14	67	24	2	1	1	11	17	18	0.498305	7
N033	12	4	3	0.181145	14	67	24	2	2	1	11	17	18	0.498305	4
N033	13	1	1	0.0399806	14	67	24	2	1	1	11	17	18	0.498305	8
N033	14	2	2	0.0516593	14	67	24	2	2	1	11	17	18	0.498305	5
N033	15	2	1	0.0992075	14	67	24	2	2	1	11	17	18	0.498305	6
N033	16	3	2	0.0270275	14	67	24	2	1	1	11	17	18	0.498305	9
N033	17	4	3	0.0840893	14	67	24	2	1	1	11	17	18	0.498305	10
N033	18	2	2	0	14	67	24	2	1	1	11	17	18	0.498305	11
N033	19	4	1	0.210247	14	67	24	2	2	1	11	17	18	0.498305	7
N033	20	1	3	0.0974781	14	67	24	2	1	1	11	17	18	0.498305	12
N033	21	4	4	0.044591	14	67	24	2	2	1	11	17	18	0.498305	8
N033	22	1	2	0.00578749	14	67	24	2	1	1	11	17	18	0.498305	13
N033	23	4	2	0.055875	14	67	24	2	1	1	11	17	18	0.498305	14
N033	24	4	3	0.119354	14	67	24	2	2	1	11	17	18	0.498305	9
N033	25	4	2	0.0530227	14	67	24	2	2	1	11	17	18	0.498305	10
N033	26	4	3	0.0366017	14	67	24	2	1	1	11	17	18	0.498305	15
N033	27	4	4	0.123253	14	67	24	2	1	1	11	17	18	0.498305	16
N033	28	4	2	0.480762	14	67	24	2	1	1	11	17	18	0.498305	17
N033	29	1	1	0.131534	14	67	24	2	2	1	11	17	18	0.498305	11
N033	30	4	3	0.0476748	14	67	24	2	2	1	11	17	18	0.498305	12
N033	31	4	4	0.0930172	14	67	24	2	1	1	11	17	18	0.498305	18
N033	32	1	3	0.14121	14	67	24	2	2	1	11	17	18	0.498305	13
N033	33	4	3	0.128302	14	67	24	2	2	1	11	17	18	0.498305	14
N033	34	4	4	0.023484	14	67	24	2	2	1	11	17	18	0.498305	15
N033	35	4	4	0.0473256	14	67	24	2	1	1	11	17	18	0.498305	19
N033	36	1	3	0.0506719	14	67	24	2	2	1	11	17	18	0.498305	16
N033	37	2	4	0.72132	14	67	24	2	1	1	11	17	18	0.498305	20
N033	38	1	2	0.0781808	14	67	24	2	2	1	11	17	18	0.498305	17
N033	39	4	4	0.0354356	14	67	24	2	2	1	11	17	18	0.498305	18
N033	40	4	4	0.0758345	14	67	24	2	2	1	11	17	18	0.498305	19
N034	2	1	1	0.252619	14	85	21	1	1	1	11	11	13	1.72909	1
N034	3	1	1	0.46873	14	85	21	1	2	1	11	11	13	1.72909	1
N034	4	4	2	0.170102	14	85	21	1	1	1	11	11	13	1.72909	2
N034	5	4	1	0.556695	14	85	21	1	1	1	11	11	13	1.72909	3
N034	6	4	4	0.32464	14	85	21	1	2	1	11	11	13	1.72909	2
N034	7	4	1	0.0619274	14	85	21	1	1	1	11	11	13	1.72909	4
N034	8	4	2	0.234003	14	85	21	1	1	1	11	11	13	1.72909	5
N034	9	4	1	0.123022	14	85	21	1	1	1	11	11	13	1.72909	6
N034	10	4	2	0.116398	14	85	21	1	1	1	11	11	13	1.72909	7
N034	11	4	1	0.0600462	14	85	21	1	1	1	11	11	13	1.72909	8
N034	12	4	3	4.67553	14	85	21	1	1	1	11	11	13	1.72909	9
N034	13	4	1	0.176258	14	85	21	1	1	1	11	11	13	1.72909	10
N034	14	4	2	0.116364	14	85	21	1	2	1	11	11	13	1.72909	3
N034	15	4	1	0.184419	14	85	21	1	1	1	11	11	13	1.72909	11
N034	16	4	2	0.0863208	14	85	21	1	1	1	11	11	13	1.72909	12
N034	17	4	3	0.422848	14	85	21	1	2	1	11	11	13	1.72909	4
N034	18	4	2	0.0243158	14	85	21	1	1	1	11	11	13	1.72909	13
N034	19	4	1	0.0437796	14	85	21	1	1	1	11	11	13	1.72909	14
N034	20	4	3	0	14	85	21	1	2	1	11	11	13	1.72909	5
N034	21	4	4	0.274286	14	85	21	1	1	1	11	11	13	1.72909	15
N034	22	3	2	1.42279	14	85	21	1	2	1	11	11	13	1.72909	6
N034	23	2	2	0.151127	14	85	21	1	2	1	11	11	13	1.72909	7
N034	24	2	3	0.200784	14	85	21	1	2	1	11	11	13	1.72909	8
N034	25	1	2	0.376274	14	85	21	1	2	1	11	11	13	1.72909	9
N034	26	2	3	0.733879	14	85	21	1	1	1	11	11	13	1.72909	16
N034	27	1	4	0.119843	14	85	21	1	2	1	11	11	13	1.72909	10
N034	28	4	2	3.61129	14	85	21	1	2	1	11	11	13	1.72909	11
N034	29	4	1	0.226071	14	85	21	1	1	1	11	11	13	1.72909	17
N034	30	4	3	0.110141	14	85	21	1	1	1	11	11	13	1.72909	18
N034	31	4	4	4.05195	14	85	21	1	2	1	11	11	13	1.72909	12
N034	32	4	3	1.86851	14	85	21	1	2	1	11	11	13	1.72909	13
N034	33	4	3	0.671381	14	85	21	1	2	1	11	11	13	1.72909	14
N034	34	4	4	0.495294	14	85	21	1	2	1	11	11	13	1.72909	15
N034	35	4	4	0.717803	14	85	21	1	2	1	11	11	13	1.72909	16
N034	36	4	3	0.113742	14	85	21	1	2	1	11	11	13	1.72909	17
N034	37	1	4	3.36218	14	85	21	1	2	1	11	11	13	1.72909	18
N034	38	4	2	0.198269	14	85	21	1	1	1	11	11	13	1.72909	19
N034	39	4	4	0.191408	14	85	21	1	2	1	11	11	13	1.72909	19
N034	40	2	4	0.245221	14	85	21	1	2	1	11	11	13	1.72909	20
N035	2	1	1	0.0607949	12	63	19	2	2	2	11	6	9	0.224798	1
N035	3	1	1	0.0648201	12	63	19	2	1	2	11	6	9	0.224798	1
N035	4	1	2	0.13626	12	63	19	2	1	2	11	6	9	0.224798	2
N035	5	2	1	0	12	63	19	2	2	2	11	6	9	0.224798	2
N035	6	2	4	0.0419981	12	63	19	2	2	2	11	6	9	0.224798	3
N035	7	2	1	0.131853	12	63	19	2	1	2	11	6	9	0.224798	3
N035	8	2	2	0.0188072	12	63	19	2	2	2	11	6	9	0.224798	4
N035	9	2	1	0	12	63	19	2	1	2	11	6	9	0.224798	4
N035	10	3	2	0	12	63	19	2	1	2	11	6	9	0.224798	5
N035	11	3	1	0	12	63	19	2	1	2	11	6	9	0.224798	6
N035	12	3	3	0.0418717	12	63	19	2	2	2	11	6	9	0.224798	5
N035	13	3	1	0.0506371	12	63	19	2	1	2	11	6	9	0.224798	7
N035	14	3	2	0.0243794	12	63	19	2	1	2	11	6	9	0.224798	8
N035	15	4	1	0.0819136	12	63	19	2	2	2	11	6	9	0.224798	6
N035	16	4	2	0	12	63	19	2	1	2	11	6	9	0.224798	9
N035	17	4	3	0.0430438	12	63	19	2	1	2	11	6	9	0.224798	10
N035	18	4	2	0	12	63	19	2	1	2	11	6	9	0.224798	11
N035	19	1	1	0	12	63	19	2	2	2	11	6	9	0.224798	7
N035	20	2	3	0	12	63	19	2	2	2	11	6	9	0.224798	8
N035	21	3	4	0.0327087	12	63	19	2	2	2	11	6	9	0.224798	9
N035	22	4	2	0.815096	12	63	19	2	1	2	11	6	9	0.224798	12
N035	23	4	2	0.0153569	12	63	19	2	1	2	11	6	9	0.224798	13
N035	24	3	3	0.102941	12	63	19	2	2	2	11	6	9	0.224798	10
N035	25	2	2	0.0945288	12	63	19	2	1	2	11	6	9	0.224798	14
N035	26	1	3	0.0402753	12	63	19	2	2	2	11	6	9	0.224798	11
N035	27	1	4	0.0322114	12	63	19	2	2	2	11	6	9	0.224798	12
N035	28	1	2	0.0625759	12	63	19	2	2	2	11	6	9	0.224798	13
N035	29	2	1	0	12	63	19	2	2	2	11	6	9	0.224798	14
N035	30	2	3	0.0316459	12	63	19	2	2	2	11	6	9	0.224798	15
N035	31	3	4	0.0207839	12	63	19	2	2	2	11	6	9	0.224798	16
N035	32	3	3	0	12	63	19	2	1	2	11	6	9	0.224798	15
N035	33	4	3	0	12	63	19	2	2	2	11	6	9	0.224798	17
N035	34	4	4	0.0191211	12	63	19	2	2	2	11	6	9	0.224798	18
N035	35	1	4	0.0744815	12	63	19	2	2	2	11	6	9	0.224798	19
N035	36	2	3	0.0408787	12	63	19	2	2	2	11	6	9	0.224798	20
N035	37	3	4	0.0514311	12	63	19	2	2	2	11	6	9	0.224798	21
N035	38	4	2	0.0144059	12	63	19	2	2	2	11	6	9	0.224798	22
N035	39	4	4	0.0181079	12	63	19	2	1	2	11	6	9	0.224798	16
N035	40	3	4	0.0293636	12	63	19	2	2	2	11	6	9	0.224798	23
N036	2	1	1	0.266541	2	41	10	2	2	2	2	11	5	-1.27949	1
N036	3	1	1	0.0232575	2	41	10	2	2	2	2	11	5	-1.27949	2
N036	4	1	2	0.0343721	2	41	10	2	2	2	2	11	5	-1.27949	3
N036	5	1	1	0.0635685	2	41	10	2	2	2	2	11	5	-1.27949	4
N036	6	2	4	0.0986825	2	41	10	2	2	2	2	11	5	-1.27949	5
N036	7	4	1	0.376746	2	41	10	2	2	2	2	11	5	-1.27949	6
N036	8	2	2	0.00562845	2	41	10	2	1	2	2	11	5	-1.27949	1
N036	9	1	1	0.13363	2	41	10	2	2	2	2	11	5	-1.27949	7
N036	10	4	2	0.551273	2	41	10	2	2	2	2	11	5	-1.27949	8
N036	11	1	1	0.0289105	2	41	10	2	1	2	2	11	5	-1.27949	2
N036	12	1	3	0.0331172	2	41	10	2	2	2	2	11	5	-1.27949	9
N036	13	1	1	0.465294	2	41	10	2	1	2	2	11	5	-1.27949	3
N036	14	3	2	0.0609805	2	41	10	2	2	2	2	11	5	-1.27949	10
N036	15	1	1	0.0664964	2	41	10	2	2	2	2	11	5	-1.27949	11
N036	16	4	2	0.111809	2	41	10	2	2	2	2	11	5	-1.27949	12
N036	17	4	3	0.285672	2	41	10	2	1	2	2	11	5	-1.27949	4
N036	18	4	2	0.0780321	2	41	10	2	1	2	2	11	5	-1.27949	5
N036	19	4	1	0.0296697	2	41	10	2	1	2	2	11	5	-1.27949	6
N036	20	4	3	0.187031	2	41	10	2	1	2	2	11	5	-1.27949	7
N036	21	4	4	0.560942	2	41	10	2	2	2	2	11	5	-1.27949	13
N036	22	4	2	0.273311	2	41	10	2	1	2	2	11	5	-1.27949	8
N036	23	4	2	0.138287	2	41	10	2	1	2	2	11	5	-1.27949	9
N036	24	4	3	0.00738967	2	41	10	2	1	2	2	11	5	-1.27949	10
N036	25	4	2	0.0353273	2	41	10	2	2	2	2	11	5	-1.27949	14
N036	26	4	3	0.0325785	2	41	10	2	1	2	2	11	5	-1.27949	11
N036	27	4	4	0.015449	2	41	10	2	2	2	2	11	5	-1.27949	15
N036	28	4	2	0.0200067	2	41	10	2	2	2	2	11	5	-1.27949	16
N036	29	4	1	0.193379	2	41	10	2	2	2	2	11	5	-1.27949	17
N036	30	4	3	0.0545092	2	41	10	2	1	2	2	11	5	-1.27949	12
N036	31	4	4	0.0923527	2	41	10	2	1	2	2	11	5	-1.27949	13
N036	32	4	3	0	2	41	10	2	2	2	2	11	5	-1.27949	18
N036	33	4	3	0.306936	2	41	10	2	2	2	2	11	5	-1.27949	19
N036	34	4	4	0.136702	2	41	10	2	2	2	2	11	5	-1.27949	20
N036	35	4	4	0.0293417	2	41	10	2	2	2	2	11	5	-1.27949	21
N036	36	4	3	0.153311	2	41	10	2	2	2	2	11	5	-1.27949	22
N036	37	4	4	0.127594	2	41	10	2	2	2	2	11	5	-1.27949	23
N036	38	4	2	0.0324689	2	41	10	2	1	2	2	11	5	-1.27949	14
N036	39	4	4	0.133233	2	41	10	2	1	2	2	11	5	-1.27949	15
N036	40	4	4	0.0691343	2	41	10	2	2	2	2	11	5	-1.27949	24
N037	2	2	1	0.28728	2	42	27	1	2	2	2	7	11	-1.21111	1
N037	3	2	1	0.0964715	2	42	27	1	1	2	2	7	11	-1.21111	1
N037	4	2	2	0.433149	2	42	27	1	2	2	2	7	11	-1.21111	2
N037	5	4	1	0.0791326	2	42	27	1	2	2	2	7	11	-1.21111	3
N037	6	3	4	0.113118	2	42	27	1	2	2	2	7	11	-1.21111	4
N037	7	3	1	0.174094	2	42	27	1	1	2	2	7	11	-1.21111	2
N037	8	3	2	0.135529	2	42	27	1	1	2	2	7	11	-1.21111	3
N037	9	3	1	0.353227	2	42	27	1	2	2	2	7	11	-1.21111	5
N037	10	3	2	0.16621	2	42	27	1	2	2	2	7	11	-1.21111	6
N037	11	4	1	0.162868	2	42	27	1	1	2	2	7	11	-1.21111	4
N037	12	3	3	0.0237041	2	42	27	1	1	2	2	7	11	-1.21111	5
N037	13	3	1	0.223503	2	42	27	1	2	2	2	7	11	-1.21111	7
N037	14	4	2	0.122843	2	42	27	1	1	2	2	7	11	-1.21111	6
N037	15	2	1	0.115341	2	42	27	1	1	2	2	7	11	-1.21111	7
N037	16	2	2	0.0349467	2	42	27	1	2	2	2	7	11	-1.21111	8
N037	17	4	3	0.211724	2	42	27	1	2	2	2	7	11	-1.21111	9
N037	18	2	2	0.0234912	2	42	27	1	1	2	2	7	11	-1.21111	8
N037	19	4	1	0.107444	2	42	27	1	2	2	2	7	11	-1.21111	10
N037	20	3	3	0.122562	2	42	27	1	1	2	2	7	11	-1.21111	9
N037	21	4	4	0.146517	2	42	27	1	2	2	2	7	11	-1.21111	11
N037	22	2	2	0.269882	2	42	27	1	1	2	2	7	11	-1.21111	10
N037	23	2	2	0.0624021	2	42	27	1	1	2	2	7	11	-1.21111	11
N037	24	2	3	0.0663218	2	42	27	1	1	2	2	7	11	-1.21111	12
N037	25	2	2	0.00175222	2	42	27	1	2	2	2	7	11	-1.21111	12
N037	26	2	3	0.255297	2	42	27	1	2	2	2	7	11	-1.21111	13
N037	27	4	4	0.423137	2	42	27	1	1	2	2	7	11	-1.21111	13
N037	28	2	2	0.556121	2	42	27	1	1	2	2	7	11	-1.21111	14
N037	29	3	1	0.379452	2	42	27	1	2	2	2	7	11	-1.21111	14
N037	30	3	3	0.0108753	2	42	27	1	1	2	2	7	11	-1.21111	15
N037	31	3	4	0.0631777	2	42	27	1	2	2	2	7	11	-1.21111	15
N037	32	2	3	0.141918	2	42	27	1	1	2	2	7	11	-1.21111	16
N037	33	2	3	0.0590135	2	42	27	1	2	2	2	7	11	-1.21111	16
N037	34	2	4	0.315733	2	42	27	1	2	2	2	7	11	-1.21111	17
N037	35	1	4	0.0310456	2	42	27	1	2	2	2	7	11	-1.21111	18
N037	36	1	3	0.315843	2	42	27	1	2	2	2	7	11	-1.21111	19
N037	37	1	4	0.105473	2	42	27	1	2	2	2	7	11	-1.21111	20
N037	38	1	2	0.0567461	2	42	27	1	2	2	2	7	11	-1.21111	21
N037	39	2	4	0.0408116	2	42	27	1	2	2	2	7	11	-1.21111	22
N037	40	2	4	1.12798	2	42	27	1	2	2	2	7	11	-1.21111	23
N038	2	1	1	0.383355	10	48	21	1	2	2	8	8	15	-0.800853	1
N038	3	1	1	0.295295	10	48	21	1	1	2	8	8	15	-0.800853	1
N038	4	1	2	0.254256	10	48	21	1	1	2	8	8	15	-0.800853	2
N038	5	1	1	0.263015	10	48	21	1	2	2	8	8	15	-0.800853	2
N038	6	1	4	0.261874	10	48	21	1	2	2	8	8	15	-0.800853	3
N038	7	1	1	0.243876	10	48	21	1	2	2	8	8	15	-0.800853	4
N038	8	1	2	0.268901	10	48	21	1	2	2	8	8	15	-0.800853	5
N038	9	1	1	0.946258	10	48	21	1	2	2	8	8	15	-0.800853	6
N038	10	1	2	0.0388375	10	48	21	1	2	2	8	8	15	-0.800853	7
N038	11	1	1	0.0467173	10	48	21	1	2	2	8	8	15	-0.800853	8
N038	12	1	3	0.0160194	10	48	21	1	2	2	8	8	15	-0.800853	9
N038	13	1	1	0.0520376	10	48	21	1	2	2	8	8	15	-0.800853	10
N038	14	1	2	0.321882	10	48	21	1	1	2	8	8	15	-0.800853	3
N038	15	1	1	0.375404	10	48	21	1	2	2	8	8	15	-0.800853	11
N038	16	1	2	0.175546	10	48	21	1	2	2	8	8	15	-0.800853	12
N038	17	1	3	0.386782	10	48	21	1	1	2	8	8	15	-0.800853	4
N038	18	1	2	0.176988	10	48	21	1	2	2	8	8	15	-0.800853	13
N038	19	1	1	0.364506	10	48	21	1	2	2	8	8	15	-0.800853	14
N038	20	1	3	0.0201501	10	48	21	1	2	2	8	8	15	-0.800853	15
N038	21	1	4	0.277176	10	48	21	1	2	2	8	8	15	-0.800853	16
N038	22	1	2	0.0508089	10	48	21	1	2	2	8	8	15	-0.800853	17
N038	23	1	2	0.0849485	10	48	21	1	1	2	8	8	15	-0.800853	5
N038	24	1	3	1.85797	10	48	21	1	1	2	8	8	15	-0.800853	6
N038	25	1	2	0.566891	10	48	21	1	1	2	8	8	15	-0.800853	7
N038	26	1	3	1.2878	10	48	21	1	2	2	8	8	15	-0.800853	18
N038	27	1	4	0.0540308	10	48	21	1	2	2	8	8	15	-0.800853	19
N038	28	4	2	0.918868	10	48	21	1	2	2	8	8	15	-0.800853	20
N038	29	1	1	0.0607322	10	48	21	1	2	2	8	8	15	-0.800853	21
N038	30	4	3	0.0171384	10	48	21	1	1	2	8	8	15	-0.800853	8
N038	31	1	4	0.230904	10	48	21	1	2	2	8	8	15	-0.800853	22
N038	32	1	3	1.03445	10	48	21	1	2	2	8	8	15	-0.800853	23
N038	33	1	3	0.271271	10	48	21	1	2	2	8	8	15	-0.800853	24
N038	34	1	4	0.0643982	10	48	21	1	1	2	8	8	15	-0.800853	9
N038	35	1	4	0.378968	10	48	21	1	2	2	8	8	15	-0.800853	25
N038	36	1	3	0	10	48	21	1	2	2	8	8	15	-0.800853	26
N038	37	1	4	0.915458	10	48	21	1	2	2	8	8	15	-0.800853	27
N038	38	1	2	0.0961402	10	48	21	1	2	2	8	8	15	-0.800853	28
N038	39	1	4	0.295038	10	48	21	1	2	2	8	8	15	-0.800853	29
N038	40	1	4	0.826838	10	48	21	1	2	2	8	8	15	-0.800853	30
N039	2	4	1	0.141341	10	63	22	1	1	2	9	5	10	0.224798	1
N039	3	4	1	0.0352298	10	63	22	1	1	2	9	5	10	0.224798	2
N039	4	4	2	0.00123668	10	63	22	1	1	2	9	5	10	0.224798	3
N039	5	1	1	0	10	63	22	1	1	2	9	5	10	0.224798	4
N039	6	1	4	0.0343553	10	63	22	1	2	2	9	5	10	0.224798	1
N039	7	1	1	0.0244179	10	63	22	1	2	2	9	5	10	0.224798	2
N039	8	1	2	0.00756818	10	63	22	1	1	2	9	5	10	0.224798	5
N039	9	2	1	0.0218181	10	63	22	1	2	2	9	5	10	0.224798	3
N039	10	4	2	0.0229542	10	63	22	1	1	2	9	5	10	0.224798	6
N039	11	2	1	0.105308	10	63	22	1	1	2	9	5	10	0.224798	7
N039	12	2	3	0.0232247	10	63	22	1	2	2	9	5	10	0.224798	4
N039	13	3	1	0.00113949	10	63	22	1	2	2	9	5	10	0.224798	5
N039	14	2	2	0.0309357	10	63	22	1	1	2	9	5	10	0.224798	8
N039	15	4	1	0.0123106	10	63	22	1	2	2	9	5	10	0.224798	6
N039	16	4	2	0.0122127	10	63	22	1	2	2	9	5	10	0.224798	7
N039	17	1	3	0.0705535	10	63	22	1	1	2	9	5	10	0.224798	9
N039	18	1	2	0.161338	10	63	22	1	1	2	9	5	10	0.224798	10
N039	19	1	1	0.226214	10	63	22	1	2	2	9	5	10	0.224798	8
N039	20	2	3	0.0648857	10	63	22	1	2	2	9	5	10	0.224798	9
N039	21	2	4	0.219387	10	63	22	1	2	2	9	5	10	0.224798	10
N039	22	3	2	0	10	63	22	1	1	2	9	5	10	0.224798	11
N039	23	2	2	0.0455709	10	63	22	1	1	2	9	5	10	0.224798	12
N039	24	4	3	0.0454453	10	63	22	1	2	2	9	5	10	0.224798	11
N039	25	4	2	0.04481	10	63	22	1	2	2	9	5	10	0.224798	12
N039	26	1	3	0.0416008	10	63	22	1	2	2	9	5	10	0.224798	13
N039	27	1	4	0.043271	10	63	22	1	1	2	9	5	10	0.224798	13
N039	28	1	2	0.0391167	10	63	22	1	2	2	9	5	10	0.224798	14
N039	29	1	1	0.0127228	10	63	22	1	1	2	9	5	10	0.224798	14
N039	30	1	3	0.00531268	10	63	22	1	2	2	9	5	10	0.224798	15
N039	31	1	4	0	10	63	22	1	2	2	9	5	10	0.224798	16
N039	32	1	3	0.00425345	10	63	22	1	2	2	9	5	10	0.224798	17
N039	33	1	3	0.0158017	10	63	22	1	2	2	9	5	10	0.224798	18
N039	34	4	4	0.00437818	10	63	22	1	2	2	9	5	10	0.224798	19
N039	35	4	4	0.00635244	10	63	22	1	2	2	9	5	10	0.224798	20
N039	36	4	3	0.00719235	10	63	22	1	1	2	9	5	10	0.224798	15
N039	37	4	4	0.00391506	10	63	22	1	2	2	9	5	10	0.224798	21
N039	38	4	2	0.0816429	10	63	22	1	2	2	9	5	10	0.224798	22
N039	39	4	4	0.0559873	10	63	22	1	1	2	9	5	10	0.224798	16
N039	40	4	4	0.0104614	10	63	22	1	2	2	9	5	10	0.224798	23
N040	2	1	1	0.256286	12	64	13	1	2	2	9	12	16	0.293175	1
N040	3	1	1	0.0966166	12	64	13	1	2	2	9	12	16	0.293175	2
N040	4	1	2	0.118419	12	64	13	1	2	2	9	12	16	0.293175	3
N040	5	1	1	0.109396	12	64	13	1	2	2	9	12	16	0.293175	4
N040	6	1	4	0.107736	12	64	13	1	2	2	9	12	16	0.293175	5
N040	7	1	1	0.413668	12	64	13	1	1	2	9	12	16	0.293175	1
N040	8	1	2	0	12	64	13	1	2	2	9	12	16	0.293175	6
N040	9	1	1	0.0433412	12	64	13	1	2	2	9	12	16	0.293175	7
N040	10	1	2	0.933793	12	64	13	1	2	2	9	12	16	0.293175	8
N040	11	1	1	0.0963637	12	64	13	1	2	2	9	12	16	0.293175	9
N040	12	1	3	0.00691969	12	64	13	1	2	2	9	12	16	0.293175	10
N040	13	1	1	0.168293	12	64	13	1	2	2	9	12	16	0.293175	11
N040	14	1	2	0.375707	12	64	13	1	2	2	9	12	16	0.293175	12
N040	15	1	1	0.0983433	12	64	13	1	2	2	9	12	16	0.293175	13
N040	16	1	2	0.137644	12	64	13	1	2	2	9	12	16	0.293175	14
N040	17	1	3	0.0795874	12	64	13	1	2	2	9	12	16	0.293175	15
N040	18	1	2	1.06712	12	64	13	1	2	2	9	12	16	0.293175	16
N040	19	1	1	0.071783	12	64	13	1	2	2	9	12	16	0.293175	17
N040	20	1	3	1.95523	12	64	13	1	2	2	9	12	16	0.293175	18
N040	21	1	4	0.0955011	12	64	13	1	2	2	9	12	16	0.293175	19
N040	22	1	2	0.369466	12	64	13	1	2	2	9	12	16	0.293175	20
N040	23	1	2	0.818366	12	64	13	1	2	2	9	12	16	0.293175	21
N040	24	1	3	0.0825252	12	64	13	1	2	2	9	12	16	0.293175	22
N040	25	1	2	0.129222	12	64	13	1	2	2	9	12	16	0.293175	23
N040	26	1	3	0.623519	12	64	13	1	2	2	9	12	16	0.293175	24
N040	27	1	4	1.71939	12	64	13	1	2	2	9	12	16	0.293175	25
N040	28	1	2	0.0940021	12	64	13	1	2	2	9	12	16	0.293175	26
N040	29	1	1	0.20144	12	64	13	1	1	2	9	12	16	0.293175	2
N040	30	1	3	0.152275	12	64	13	1	2	2	9	12	16	0.293175	27
N040	31	1	4	0.0761064	12	64	13	1	2	2	9	12	16	0.293175	28
N040	32	1	3	0.976226	12	64	13	1	1	2	9	12	16	0.293175	3
N040	33	1	3	0.325683	12	64	13	1	2	2	9	12	16	0.293175	29
N040	34	1	4	2.30283	12	64	13	1	2	2	9	12	16	0.293175	30
N040	35	1	4	0.0146373	12	64	13	1	2	2	9	12	16	0.293175	31
N040	36	1	3	0.296199	12	64	13	1	2	2	9	12	16	0.293175	32
N040	37	1	4	0.115283	12	64	13	1	2	2	9	12	16	0.293175	33
N040	38	1	2	0.205561	12	64	13	1	1	2	9	12	16	0.293175	4
N040	39	1	4	0.0548525	12	64	13	1	2	2	9	12	16	0.293175	34
N040	40	1	4	0.126477	12	64	13	1	2	2	9	12	16	0.293175	35
N041	2	3	1	0.233765	17	78	32	2	1	2	11	6	16	1.25045	1
N041	3	1	1	0.185005	17	78	32	2	2	2	11	6	16	1.25045	1
N041	4	4	2	0.230257	17	78	32	2	2	2	11	6	16	1.25045	2
N041	5	2	1	0.091931	17	78	32	2	1	2	11	6	16	1.25045	2
N041	6	4	4	0.392543	17	78	32	2	1	2	11	6	16	1.25045	3
N041	7	2	1	0.123585	17	78	32	2	1	2	11	6	16	1.25045	4
N041	8	1	2	0.302936	17	78	32	2	2	2	11	6	16	1.25045	3
N041	9	1	1	0.212781	17	78	32	2	1	2	11	6	16	1.25045	5
N041	10	3	2	0.300104	17	78	32	2	2	2	11	6	16	1.25045	4
N041	11	2	1	0.56556	17	78	32	2	1	2	11	6	16	1.25045	6
N041	12	3	3	0.176437	17	78	32	2	1	2	11	6	16	1.25045	7
N041	13	1	1	0	17	78	32	2	2	2	11	6	16	1.25045	5
N041	14	1	2	0.0529674	17	78	32	2	1	2	11	6	16	1.25045	8
N041	15	1	1	0.678843	17	78	32	2	2	2	11	6	16	1.25045	6
N041	16	1	2	1.40879	17	78	32	2	2	2	11	6	16	1.25045	7
N041	17	1	3	0.233471	17	78	32	2	1	2	11	6	16	1.25045	9
N041	18	1	2	0.932068	17	78	32	2	2	2	11	6	16	1.25045	8
N041	19	1	1	0.102701	17	78	32	2	2	2	11	6	16	1.25045	9
N041	20	2	3	0.517222	17	78	32	2	2	2	11	6	16	1.25045	10
N041	21	4	4	0.318293	17	78	32	2	2	2	11	6	16	1.25045	11
N041	22	4	2	0.321071	17	78	32	2	2	2	11	6	16	1.25045	12
N041	23	4	2	0.0768304	17	78	32	2	1	2	11	6	16	1.25045	10
N041	24	4	3	0.00932898	17	78	32	2	1	2	11	6	16	1.25045	11
N041	25	4	2	0.0705807	17	78	32	2	1	2	11	6	16	1.25045	12
N041	26	4	3	0.0297746	17	78	32	2	2	2	11	6	16	1.25045	13
N041	27	4	4	0.726099	17	78	32	2	2	2	11	6	16	1.25045	14
N041	28	4	2	0.380991	17	78	32	2	2	2	11	6	16	1.25045	15
N041	29	1	1	0.0711237	17	78	32	2	2	2	11	6	16	1.25045	16
N041	30	3	3	0.718213	17	78	32	2	2	2	11	6	16	1.25045	17
N041	31	4	4	0.544485	17	78	32	2	2	2	11	6	16	1.25045	18
N041	32	4	3	0.542948	17	78	32	2	2	2	11	6	16	1.25045	19
N041	33	4	3	0.293922	17	78	32	2	2	2	11	6	16	1.25045	20
N041	34	4	4	0.0358754	17	78	32	2	2	2	11	6	16	1.25045	21
N041	35	4	4	0.14718	17	78	32	2	2	2	11	6	16	1.25045	22
N041	36	3	3	1.07799	17	78	32	2	1	2	11	6	16	1.25045	13
N041	37	1	4	0.702735	17	78	32	2	2	2	11	6	16	1.25045	23
N041	38	1	2	0.981349	17	78	32	2	1	2	11	6	16	1.25045	14
N041	39	1	4	0.19	17	78	32	2	2	2	11	6	16	1.25045	24
N041	40	2	4	0.115903	17	78	32	2	2	2	11	6	16	1.25045	25
N042	2	4	1	0.1459	5	48	13	2	1	2	5	10	4	-0.800853	1
N042	3	4	1	1.52394	5	48	13	2	1	2	5	10	4	-0.800853	2
N042	4	4	2	0.526796	5	48	13	2	1	2	5	10	4	-0.800853	3
N042	5	4	1	0.456364	5	48	13	2	1	2	5	10	4	-0.800853	4
N042	6	2	4	0.542171	5	48	13	2	2	2	5	10	4	-0.800853	1
N042	7	3	1	0.246974	5	48	13	2	1	2	5	10	4	-0.800853	5
N042	8	4	2	0.262933	5	48	13	2	2	2	5	10	4	-0.800853	2
N042	9	3	1	0.0789467	5	48	13	2	1	2	5	10	4	-0.800853	6
N042	10	3	2	0.944139	5	48	13	2	1	2	5	10	4	-0.800853	7
N042	11	3	1	0.734714	5	48	13	2	1	2	5	10	4	-0.800853	8
N042	12	4	3	0.0532793	5	48	13	2	2	2	5	10	4	-0.800853	3
N042	13	4	1	0.351256	5	48	13	2	1	2	5	10	4	-0.800853	9
N042	14	4	2	0.508432	5	48	13	2	2	2	5	10	4	-0.800853	4
N042	15	4	1	0.0376	5	48	13	2	1	2	5	10	4	-0.800853	10
N042	16	4	2	0.152271	5	48	13	2	1	2	5	10	4	-0.800853	11
N042	17	4	3	0.086147	5	48	13	2	2	2	5	10	4	-0.800853	5
N042	18	4	2	0.163038	5	48	13	2	1	2	5	10	4	-0.800853	12
N042	19	4	1	0.0611904	5	48	13	2	1	2	5	10	4	-0.800853	13
N042	20	4	3	0.110056	5	48	13	2	2	2	5	10	4	-0.800853	6
N042	21	4	4	0.504578	5	48	13	2	2	2	5	10	4	-0.800853	7
N042	22	4	2	0.0652114	5	48	13	2	1	2	5	10	4	-0.800853	14
N042	23	4	2	0.754348	5	48	13	2	2	2	5	10	4	-0.800853	8
N042	24	4	3	0.88477	5	48	13	2	1	2	5	10	4	-0.800853	15
N042	25	4	2	0.0595512	5	48	13	2	1	2	5	10	4	-0.800853	16
N042	26	4	3	3.01243	5	48	13	2	2	2	5	10	4	-0.800853	9
N042	27	4	4	0.0143981	5	48	13	2	2	2	5	10	4	-0.800853	10
N042	28	4	2	0.294029	5	48	13	2	1	2	5	10	4	-0.800853	17
N042	29	4	1	0.0782183	5	48	13	2	2	2	5	10	4	-0.800853	11
N042	30	4	3	0.115367	5	48	13	2	1	2	5	10	4	-0.800853	18
N042	31	3	4	0.233011	5	48	13	2	2	2	5	10	4	-0.800853	12
N042	32	3	3	0.367274	5	48	13	2	1	2	5	10	4	-0.800853	19
N042	33	4	3	0.0440828	5	48	13	2	2	2	5	10	4	-0.800853	13
N042	34	4	4	0.256579	5	48	13	2	1	2	5	10	4	-0.800853	20
N042	35	3	4	0.0861876	5	48	13	2	2	2	5	10	4	-0.800853	14
N042	36	3	3	3.66699	5	48	13	2	1	2	5	10	4	-0.800853	21
N042	37	2	4	0.232019	5	48	13	2	1	2	5	10	4	-0.800853	22
N042	38	4	2	0.00410292	5	48	13	2	2	2	5	10	4	-0.800853	15
N042	39	3	4	1.17344	5	48	13	2	2	2	5	10	4	-0.800853	16
N042	40	2	4	4.7213	5	48	13	2	2	2	5	10	4	-0.800853	17
N043	2	1	1	0.112983	1	41	8	2	2	2	1	6	6	-1.27949	1
N043	3	1	1	0.0416611	1	41	8	2	2	2	1	6	6	-1.27949	2
N043	4	1	2	0.0654753	1	41	8	2	1	2	1	6	6	-1.27949	1
N043	5	1	1	0.0966826	1	41	8	2	2	2	1	6	6	-1.27949	3
N043	6	1	4	0.193168	1	41	8	2	2	2	1	6	6	-1.27949	4
N043	7	1	1	0.180686	1	41	8	2	2	2	1	6	6	-1.27949	5
N043	8	1	2	0.0493627	1	41	8	2	2	2	1	6	6	-1.27949	6
N043	9	1	1	0	1	41	8	2	2	2	1	6	6	-1.27949	7
N043	10	1	2	0.0148762	1	41	8	2	2	2	1	6	6	-1.27949	8
N043	11	1	1	0.0678793	1	41	8	2	2	2	1	6	6	-1.27949	9
N043	12	1	3	0.0226424	1	41	8	2	1	2	1	6	6	-1.27949	2
N043	13	1	1	0.0229118	1	41	8	2	1	2	1	6	6	-1.27949	3
N043	14	1	2	0.263745	1	41	8	2	1	2	1	6	6	-1.27949	4
N043	15	1	1	0.364003	1	41	8	2	1	2	1	6	6	-1.27949	5
N043	16	1	2	0.211281	1	41	8	2	2	2	1	6	6	-1.27949	10
N043	17	1	3	0.0387494	1	41	8	2	1	2	1	6	6	-1.27949	6
N043	18	1	2	0.0521521	1	41	8	2	2	2	1	6	6	-1.27949	11
N043	19	1	1	0.364639	1	41	8	2	2	2	1	6	6	-1.27949	12
N043	20	1	3	0.0222271	1	41	8	2	2	2	1	6	6	-1.27949	13
N043	21	1	4	0.0559586	1	41	8	2	2	2	1	6	6	-1.27949	14
N043	22	1	2	0.0336767	1	41	8	2	2	2	1	6	6	-1.27949	15
N043	23	1	2	0.0400874	1	41	8	2	2	2	1	6	6	-1.27949	16
N043	24	1	3	1.32911	1	41	8	2	2	2	1	6	6	-1.27949	17
N043	25	1	2	0.00789661	1	41	8	2	1	2	1	6	6	-1.27949	7
N043	26	1	3	0.0286591	1	41	8	2	2	2	1	6	6	-1.27949	18
N043	27	1	4	0.230839	1	41	8	2	2	2	1	6	6	-1.27949	19
N043	28	1	2	0.0343713	1	41	8	2	2	2	1	6	6	-1.27949	20
N043	29	1	1	0.309307	1	41	8	2	2	2	1	6	6	-1.27949	21
N043	30	1	3	0.583681	1	41	8	2	2	2	1	6	6	-1.27949	22
N043	31	1	4	0.033624	1	41	8	2	1	2	1	6	6	-1.27949	8
N043	32	1	3	0.0346559	1	41	8	2	2	2	1	6	6	-1.27949	23
N043	33	1	3	0.0646244	1	41	8	2	1	2	1	6	6	-1.27949	9
N043	34	1	4	0.174005	1	41	8	2	2	2	1	6	6	-1.27949	24
N043	35	1	4	0.654203	1	41	8	2	2	2	1	6	6	-1.27949	25
N043	36	1	3	0.0169899	1	41	8	2	1	2	1	6	6	-1.27949	10
N043	37	1	4	0.0295865	1	41	8	2	2	2	1	6	6	-1.27949	26
N043	38	1	2	0.115192	1	41	8	2	2	2	1	6	6	-1.27949	27
N043	39	1	4	0.112357	1	41	8	2	1	2	1	6	6	-1.27949	11
N043	40	1	4	0.288979	1	41	8	2	2	2	1	6	6	-1.27949	28
N043.1	2	2	1	0.858187	0	35	14	1	2	2	0	14	11	-1.68975	1
N043.1	3	2	1	1.48985	0	35	14	1	1	2	0	14	11	-1.68975	1
N043.1	4	2	2	0.68815	0	35	14	1	2	2	0	14	11	-1.68975	2
N043.1	5	2	1	0.592246	0	35	14	1	2	2	0	14	11	-1.68975	3
N043.1	6	2	4	0.326708	0	35	14	1	2	2	0	14	11	-1.68975	4
N043.1	7	2	1	2.1104	0	35	14	1	1	2	0	14	11	-1.68975	2
N043.1	8	2	2	0.806821	0	35	14	1	1	2	0	14	11	-1.68975	3
N043.1	9	2	1	2.50599	0	35	14	1	2	2	0	14	11	-1.68975	5
N043.1	10	2	2	0.13248	0	35	14	1	2	2	0	14	11	-1.68975	6
N043.1	11	2	1	0.130263	0	35	14	1	1	2	0	14	11	-1.68975	4
N043.1	12	2	3	0.386532	0	35	14	1	2	2	0	14	11	-1.68975	7
N043.1	13	2	1	0.714723	0	35	14	1	1	2	0	14	11	-1.68975	5
N043.1	14	2	2	0.423307	0	35	14	1	2	2	0	14	11	-1.68975	8
N043.1	15	2	1	0.0753226	0	35	14	1	1	2	0	14	11	-1.68975	6
N043.1	16	2	2	0.512474	0	35	14	1	2	2	0	14	11	-1.68975	9
N043.1	17	2	3	1.16655	0	35	14	1	2	2	0	14	11	-1.68975	10
N043.1	18	2	2	1.63821	0	35	14	1	2	2	0	14	11	-1.68975	11
N043.1	19	2	1	0.0820545	0	35	14	1	1	2	0	14	11	-1.68975	7
N043.1	20	2	3	0.34741	0	35	14	1	1	2	0	14	11	-1.68975	8
N043.1	21	2	4	0.0831706	0	35	14	1	2	2	0	14	11	-1.68975	12
N043.1	22	2	2	3.24189	0	35	14	1	2	2	0	14	11	-1.68975	13
N043.1	23	2	2	0.240128	0	35	14	1	1	2	0	14	11	-1.68975	9
N043.1	24	2	3	1.00477	0	35	14	1	2	2	0	14	11	-1.68975	14
N043.1	25	2	2	0.307304	0	35	14	1	2	2	0	14	11	-1.68975	15
N043.1	26	2	3	1.16437	0	35	14	1	1	2	0	14	11	-1.68975	10
N043.1	27	2	4	0.465007	0	35	14	1	1	2	0	14	11	-1.68975	11
N043.1	28	2	2	0.476766	0	35	14	1	2	2	0	14	11	-1.68975	16
N043.1	29	2	1	0.416737	0	35	14	1	1	2	0	14	11	-1.68975	12
N043.1	30	2	3	0.906367	0	35	14	1	2	2	0	14	11	-1.68975	17
N043.1	31	2	4	0.230145	0	35	14	1	2	2	0	14	11	-1.68975	18
N043.1	32	2	3	0.436185	0	35	14	1	1	2	0	14	11	-1.68975	13
N043.1	33	2	3	0.231769	0	35	14	1	2	2	0	14	11	-1.68975	19
N043.1	34	2	4	0.672961	0	35	14	1	2	2	0	14	11	-1.68975	20
N043.1	35	2	4	0.459699	0	35	14	1	2	2	0	14	11	-1.68975	21
N043.1	36	2	3	0.945964	0	35	14	1	2	2	0	14	11	-1.68975	22
N043.1	37	2	4	0.352449	0	35	14	1	1	2	0	14	11	-1.68975	14
N043.1	38	2	2	1.27781	0	35	14	1	2	2	0	14	11	-1.68975	23
N043.1	39	2	4	0.2726	0	35	14	1	2	2	0	14	11	-1.68975	24
N043.1	40	2	4	1.61857	0	35	14	1	2	2	0	14	11	-1.68975	25
N044	2	2	1	0.00609378	15	76	26	2	2	1	8	7	13	1.1137	1
N044	3	2	1	0.0068877	15	76	26	2	1	1	8	7	13	1.1137	1
N044	4	4	2	0.00308001	15	76	26	2	1	1	8	7	13	1.1137	2
N044	5	2	1	0	15	76	26	2	1	1	8	7	13	1.1137	3
N044	6	4	4	0.0119331	15	76	26	2	2	1	8	7	13	1.1137	2
N044	7	2	1	0.0157152	15	76	26	2	1	1	8	7	13	1.1137	4
N044	8	2	2	0.00654152	15	76	26	2	1	1	8	7	13	1.1137	5
N044	9	4	1	0.00856971	15	76	26	2	1	1	8	7	13	1.1137	6
N044	10	2	2	0.00582643	15	76	26	2	1	1	8	7	13	1.1137	7
N044	11	2	1	0.00950119	15	76	26	2	1	1	8	7	13	1.1137	8
N044	12	2	3	0.0404452	15	76	26	2	2	1	8	7	13	1.1137	3
N044	13	1	1	0.00618341	15	76	26	2	2	1	8	7	13	1.1137	4
N044	14	4	2	0.0261432	15	76	26	2	2	1	8	7	13	1.1137	5
N044	15	4	1	0.00329505	15	76	26	2	1	1	8	7	13	1.1137	9
N044	16	4	2	0.0119899	15	76	26	2	2	1	8	7	13	1.1137	6
N044	17	4	3	0.026378	15	76	26	2	1	1	8	7	13	1.1137	10
N044	18	4	2	0.0224252	15	76	26	2	2	1	8	7	13	1.1137	7
N044	19	4	1	0.00318457	15	76	26	2	1	1	8	7	13	1.1137	11
N044	20	4	3	0.00529005	15	76	26	2	1	1	8	7	13	1.1137	12
N044	21	2	4	0.00278541	15	76	26	2	2	1	8	7	13	1.1137	8
N044	22	1	2	0.00538016	15	76	26	2	2	1	8	7	13	1.1137	9
N044	23	1	2	0.000990817	15	76	26	2	2	1	8	7	13	1.1137	10
N044	24	4	3	0.0305141	15	76	26	2	1	1	8	7	13	1.1137	13
N044	25	4	2	0.00358008	15	76	26	2	2	1	8	7	13	1.1137	11
N044	26	4	3	0.222084	15	76	26	2	2	1	8	7	13	1.1137	12
N044	27	2	4	0.00565614	15	76	26	2	2	1	8	7	13	1.1137	13
N044	28	1	2	0.0170456	15	76	26	2	2	1	8	7	13	1.1137	14
N044	29	1	1	0.00369441	15	76	26	2	2	1	8	7	13	1.1137	15
N044	30	1	3	0.120579	15	76	26	2	2	1	8	7	13	1.1137	16
N044	31	1	4	0.02027	15	76	26	2	2	1	8	7	13	1.1137	17
N044	32	1	3	0.00192837	15	76	26	2	2	1	8	7	13	1.1137	18
N044	33	1	3	0.0154908	15	76	26	2	2	1	8	7	13	1.1137	19
N044	34	4	4	0.00847573	15	76	26	2	2	1	8	7	13	1.1137	20
N044	35	2	4	0.000244878	15	76	26	2	2	1	8	7	13	1.1137	21
N044	36	1	3	0.00190729	15	76	26	2	2	1	8	7	13	1.1137	22
N044	37	1	4	0.0256003	15	76	26	2	2	1	8	7	13	1.1137	23
N044	38	4	2	0.0441343	15	76	26	2	2	1	8	7	13	1.1137	24
N044	39	4	4	0.00715577	15	76	26	2	1	1	8	7	13	1.1137	14
N044	40	4	4	0.0748472	15	76	26	2	2	1	8	7	13	1.1137	25
N045	2	2	1	0.254292	0	63	7	1	2	1	0	12	10	0.224798	1
N045	3	1	1	0.11528	0	63	7	1	1	1	0	12	10	0.224798	1
N045	4	1	2	0.362099	0	63	7	1	1	1	0	12	10	0.224798	2
N045	5	2	1	0.135357	0	63	7	1	2	1	0	12	10	0.224798	2
N045	6	2	4	0.197715	0	63	7	1	1	1	0	12	10	0.224798	3
N045	7	4	1	0.154841	0	63	7	1	1	1	0	12	10	0.224798	4
N045	8	3	2	0.342209	0	63	7	1	1	1	0	12	10	0.224798	5
N045	9	2	1	0.0690722	0	63	7	1	2	1	0	12	10	0.224798	3
N045	10	2	2	0	0	63	7	1	1	1	0	12	10	0.224798	6
N045	11	2	1	0.0696426	0	63	7	1	2	1	0	12	10	0.224798	4
N045	12	2	3	0	0	63	7	1	2	1	0	12	10	0.224798	5
N045	13	2	1	0.590074	0	63	7	1	1	1	0	12	10	0.224798	7
N045	14	1	2	0.0266499	0	63	7	1	1	1	0	12	10	0.224798	8
N045	15	1	1	0.249675	0	63	7	1	2	1	0	12	10	0.224798	6
N045	16	1	2	0	0	63	7	1	1	1	0	12	10	0.224798	9
N045	17	1	3	0.536648	0	63	7	1	1	1	0	12	10	0.224798	10
N045	18	4	2	0.295601	0	63	7	1	2	1	0	12	10	0.224798	7
N045	19	1	1	0.110525	0	63	7	1	1	1	0	12	10	0.224798	11
N045	20	1	3	0.414606	0	63	7	1	1	1	0	12	10	0.224798	12
N045	21	1	4	0.116145	0	63	7	1	2	1	0	12	10	0.224798	8
N045	22	1	2	0.0266974	0	63	7	1	2	1	0	12	10	0.224798	9
N045	23	1	2	0.862964	0	63	7	1	1	1	0	12	10	0.224798	13
N045	24	1	3	0.556369	0	63	7	1	2	1	0	12	10	0.224798	10
N045	25	2	2	0.238744	0	63	7	1	2	1	0	12	10	0.224798	11
N045	26	1	3	2.31601	0	63	7	1	2	1	0	12	10	0.224798	12
N045	27	1	4	0.700116	0	63	7	1	2	1	0	12	10	0.224798	13
N045	28	1	2	0.181379	0	63	7	1	1	1	0	12	10	0.224798	14
N045	29	1	1	0.100405	0	63	7	1	2	1	0	12	10	0.224798	14
N045	30		3		0	63	7	1	2	1	0	12	10	0.224798	15
N045	31	2	4	0.21012	0	63	7	1	2	1	0	12	10	0.224798	16
N045	32	2	3	0.601473	0	63	7	1	2	1	0	12	10	0.224798	17
N045	33	1	3	1.12516	0	63	7	1	2	1	0	12	10	0.224798	18
N045	34	2	4	0.314819	0	63	7	1	2	1	0	12	10	0.224798	19
N045	35	2	4	0.312093	0	63	7	1	2	1	0	12	10	0.224798	20
N045	36	2	3	0.721037	0	63	7	1	2	1	0	12	10	0.224798	21
N045	37	1	4	0.20037	0	63	7	1	2	1	0	12	10	0.224798	22
N045	38	1	2	0.280961	0	63	7	1	2	1	0	12	10	0.224798	23
N045	39	1	4	0.46656	0	63	7	1	2	1	0	12	10	0.224798	24
N045	40	2	4	0.0860709	0	63	7	1	2	1	0	12	10	0.224798	25
N046	2	3	1	0.960019	12	79	17	2	1	1	11	4	10	1.31883	1
N046	3	2	1	0.128229	12	79	17	2	1	1	11	4	10	1.31883	2
N046	4	1	2	0.248167	12	79	17	2	1	1	11	4	10	1.31883	3
N046	5	1	1	0.18239	12	79	17	2	1	1	11	4	10	1.31883	4
N046	6	4	4	0.232354	12	79	17	2	2	1	11	4	10	1.31883	1
N046	7	3	1	0.43941	12	79	17	2	1	1	11	4	10	1.31883	5
N046	8	2	2	1.76788	12	79	17	2	1	1	11	4	10	1.31883	6
N046	9	4	1	0.928839	12	79	17	2	2	1	11	4	10	1.31883	2
N046	10	3	2	0.346551	12	79	17	2	1	1	11	4	10	1.31883	7
N046	11	2	1	0.314767	12	79	17	2	1	1	11	4	10	1.31883	8
N046	12	1	3	0.0539178	12	79	17	2	1	1	11	4	10	1.31883	9
N046	13	4	1	0.783162	12	79	17	2	2	1	11	4	10	1.31883	3
N046	14	3	2	0.0459823	12	79	17	2	1	1	11	4	10	1.31883	10
N046	15	2	1	0.128008	12	79	17	2	1	1	11	4	10	1.31883	11
N046	16	1	2	0.0495612	12	79	17	2	1	1	11	4	10	1.31883	12
N046	17	4	3	0.842595	12	79	17	2	2	1	11	4	10	1.31883	4
N046	18	4	2	0.0549788	12	79	17	2	2	1	11	4	10	1.31883	5
N046	19	4	1	0.311677	12	79	17	2	2	1	11	4	10	1.31883	6
N046	20	3	3	0.123875	12	79	17	2	1	1	11	4	10	1.31883	13
N046	21	3	4	0.0921277	12	79	17	2	1	1	11	4	10	1.31883	14
N046	22	2	2	0.107821	12	79	17	2	1	1	11	4	10	1.31883	15
N046	23	4	2	0.118703	12	79	17	2	2	1	11	4	10	1.31883	7
N046	24	3	3	0.240544	12	79	17	2	1	1	11	4	10	1.31883	16
N046	25	4	2	0.455024	12	79	17	2	2	1	11	4	10	1.31883	8
N046	26	4	3	0.141676	12	79	17	2	2	1	11	4	10	1.31883	9
N046	27	4	4	0.0803721	12	79	17	2	2	1	11	4	10	1.31883	10
N046	28	4	2	0.20639	12	79	17	2	2	1	11	4	10	1.31883	11
N046	29	4	1	0.826289	12	79	17	2	2	1	11	4	10	1.31883	12
N046	30	3	3	0.0948154	12	79	17	2	1	1	11	4	10	1.31883	17
N046	31	4	4	0.0474179	12	79	17	2	2	1	11	4	10	1.31883	13
N046	32	4	3	0.235706	12	79	17	2	2	1	11	4	10	1.31883	14
N046	33	4	3	1.11216	12	79	17	2	2	1	11	4	10	1.31883	15
N046	34	3	4	0.683572	12	79	17	2	1	1	11	4	10	1.31883	18
N046	35	2	4	0.0669718	12	79	17	2	1	1	11	4	10	1.31883	19
N046	36	4	3	0.283123	12	79	17	2	2	1	11	4	10	1.31883	16
N046	37	4	4	0.49956	12	79	17	2	2	1	11	4	10	1.31883	17
N046	38	3	2	0.0804939	12	79	17	2	1	1	11	4	10	1.31883	20
N046	39	4	4	0.0264797	12	79	17	2	2	1	11	4	10	1.31883	18
N046	40	4	4	0.000860789	12	79	17	2	2	1	11	4	10	1.31883	19
N047	2	1	1	0.075988	6	69	37	2	2	1	5	15	12	0.635059	1
N047	3	1	1	0.0111859	6	69	37	2	2	1	5	15	12	0.635059	2
N047	4	1	2	0.113963	6	69	37	2	2	1	5	15	12	0.635059	3
N047	5	1	1	0.00192059	6	69	37	2	2	1	5	15	12	0.635059	4
N047	6	4	4	0.468013	6	69	37	2	2	1	5	15	12	0.635059	5
N047	7	4	1	0.178141	6	69	37	2	1	1	5	15	12	0.635059	1
N047	8	4	2	0.871597	6	69	37	2	1	1	5	15	12	0.635059	2
N047	9	4	1	0.122635	6	69	37	2	1	1	5	15	12	0.635059	3
N047	10	4	2	0.4547	6	69	37	2	1	1	5	15	12	0.635059	4
N047	11	1	1	0.360477	6	69	37	2	2	1	5	15	12	0.635059	6
N047	12	2	3	0.283245	6	69	37	2	2	1	5	15	12	0.635059	7
N047	13	2	1	0.0603813	6	69	37	2	1	1	5	15	12	0.635059	5
N047	14	1	2	0.0367278	6	69	37	2	2	1	5	15	12	0.635059	8
N047	15	4	1	0.0228645	6	69	37	2	1	1	5	15	12	0.635059	6
N047	16	4	2	0.576028	6	69	37	2	1	1	5	15	12	0.635059	7
N047	17	4	3	1.40668	6	69	37	2	2	1	5	15	12	0.635059	9
N047	18	4	2	0	6	69	37	2	2	1	5	15	12	0.635059	10
N047	19	1	1	0.454503	6	69	37	2	2	1	5	15	12	0.635059	11
N047	20	1	3	1.49804	6	69	37	2	1	1	5	15	12	0.635059	8
N047	21	1	4	0.0464202	6	69	37	2	2	1	5	15	12	0.635059	12
N047	22	1	2	0.116592	6	69	37	2	2	1	5	15	12	0.635059	13
N047	23	1	2	0.0606359	6	69	37	2	2	1	5	15	12	0.635059	14
N047	24	4	3	0.338133	6	69	37	2	1	1	5	15	12	0.635059	9
N047	25	4	2	0.223804	6	69	37	2	2	1	5	15	12	0.635059	15
N047	26	2	3	0.0262894	6	69	37	2	2	1	5	15	12	0.635059	16
N047	27	2	4	0.0477168	6	69	37	2	2	1	5	15	12	0.635059	17
N047	28	2	2	0.0449948	6	69	37	2	1	1	5	15	12	0.635059	10
N047	29	2	1	0.125603	6	69	37	2	1	1	5	15	12	0.635059	11
N047	30	2	3	0.097847	6	69	37	2	1	1	5	15	12	0.635059	12
N047	31	2	4	0.631482	6	69	37	2	1	1	5	15	12	0.635059	13
N047	32	2	3	0.038762	6	69	37	2	2	1	5	15	12	0.635059	18
N047	33	2	3	0.0587541	6	69	37	2	1	1	5	15	12	0.635059	14
N047	34	2	4	0.0125734	6	69	37	2	2	1	5	15	12	0.635059	19
N047	35	1	4	0.00577407	6	69	37	2	2	1	5	15	12	0.635059	20
N047	36	1	3	1.46792	6	69	37	2	2	1	5	15	12	0.635059	21
N047	37	1	4	0.0455506	6	69	37	2	2	1	5	15	12	0.635059	22
N047	38	1	2	0.0672316	6	69	37	2	2	1	5	15	12	0.635059	23
N047	39	1	4	0.0322482	6	69	37	2	2	1	5	15	12	0.635059	24
N047	40	4	4	0.188589	6	69	37	2	2	1	5	15	12	0.635059	25
N048	2	2	1	0.396414	12	68	15	2	2	1	12	14	12	0.566682	1
N048	3	3	1	0.340806	12	68	15	2	1	1	12	14	12	0.566682	1
N048	4	1	2	0.0758454	12	68	15	2	1	1	12	14	12	0.566682	2
N048	5	2	1	0.0950456	12	68	15	2	2	1	12	14	12	0.566682	2
N048	6	3	4	0.0380736	12	68	15	2	2	1	12	14	12	0.566682	3
N048	7	4	1	0.16598	12	68	15	2	1	1	12	14	12	0.566682	3
N048	8	1	2	0.141028	12	68	15	2	1	1	12	14	12	0.566682	4
N048	9	2	1	0.0136721	12	68	15	2	2	1	12	14	12	0.566682	4
N048	10	1	2	0.113016	12	68	15	2	2	1	12	14	12	0.566682	5
N048	11	3	1	0.512584	12	68	15	2	2	1	12	14	12	0.566682	6
N048	12	1	3	0	12	68	15	2	2	1	12	14	12	0.566682	7
N048	13	4	1	0.101951	12	68	15	2	2	1	12	14	12	0.566682	8
N048	14	1	2	0.0344868	12	68	15	2	1	1	12	14	12	0.566682	5
N048	15	2	1	0	12	68	15	2	1	1	12	14	12	0.566682	6
N048	16	2	2	0	12	68	15	2	1	1	12	14	12	0.566682	7
N048	17	4	3	0.00609742	12	68	15	2	2	1	12	14	12	0.566682	9
N048	18	1	2	0.0189226	12	68	15	2	1	1	12	14	12	0.566682	8
N048	19	2	1	0	12	68	15	2	1	1	12	14	12	0.566682	9
N048	20	1	3	0.0927277	12	68	15	2	2	1	12	14	12	0.566682	10
N048	21	1	4	0.0852084	12	68	15	2	2	1	12	14	12	0.566682	11
N048	22	2	2	0	12	68	15	2	1	1	12	14	12	0.566682	10
N048	23	3	2	0.015153	12	68	15	2	1	1	12	14	12	0.566682	11
N048	24	1	3	0	12	68	15	2	1	1	12	14	12	0.566682	12
N048	25	2	2	0.00923075	12	68	15	2	2	1	12	14	12	0.566682	12
N048	26	1	3	0	12	68	15	2	2	1	12	14	12	0.566682	13
N048	27	1	4	0	12	68	15	2	1	1	12	14	12	0.566682	13
N048	28	2	2	0	12	68	15	2	2	1	12	14	12	0.566682	14
N048	29	3	1	0.0457691	12	68	15	2	2	1	12	14	12	0.566682	15
N048	30	4	3	0	12	68	15	2	2	1	12	14	12	0.566682	16
N048	31	1	4	0	12	68	15	2	2	1	12	14	12	0.566682	17
N048	32	2	3	0.0652745	12	68	15	2	1	1	12	14	12	0.566682	14
N048	33	3	3	0	12	68	15	2	2	1	12	14	12	0.566682	18
N048	34	4	4	0	12	68	15	2	2	1	12	14	12	0.566682	19
N048	35	1	4	0	12	68	15	2	2	1	12	14	12	0.566682	20
N048	36	2	3	0.0134605	12	68	15	2	2	1	12	14	12	0.566682	21
N048	37	4	4	0.0350152	12	68	15	2	2	1	12	14	12	0.566682	22
N048	38	1	2	0.00977659	12	68	15	2	2	1	12	14	12	0.566682	23
N048	39	1	4	0.0305426	12	68	15	2	2	1	12	14	12	0.566682	24
N048	40	4	4	0	12	68	15	2	2	1	12	14	12	0.566682	25
N049	2	2	1	0.291452	5	58	12	1	1	1	4	6	8	-0.117086	1
N049	3	2	1	0.23827	5	58	12	1	1	1	4	6	8	-0.117086	2
N049	4	2	2	1.06216	5	58	12	1	2	1	4	6	8	-0.117086	1
N049	5	2	1	0.591694	5	58	12	1	1	1	4	6	8	-0.117086	3
N049	6	2	4	0.172128	5	58	12	1	2	1	4	6	8	-0.117086	2
N049	7	2	1	0.0661229	5	58	12	1	2	1	4	6	8	-0.117086	3
N049	8	2	2	0.155021	5	58	12	1	2	1	4	6	8	-0.117086	4
N049	9	2	1	0.235853	5	58	12	1	1	1	4	6	8	-0.117086	4
N049	10	2	2	0.745441	5	58	12	1	2	1	4	6	8	-0.117086	5
N049	11	2	1	0.215902	5	58	12	1	2	1	4	6	8	-0.117086	6
N049	12	2	3	0.644311	5	58	12	1	1	1	4	6	8	-0.117086	5
N049	13	2	1	0.120161	5	58	12	1	2	1	4	6	8	-0.117086	7
N049	14	2	2	0.195921	5	58	12	1	1	1	4	6	8	-0.117086	6
N049	15	2	1	0.151728	5	58	12	1	1	1	4	6	8	-0.117086	7
N049	16	2	2	0.744256	5	58	12	1	1	1	4	6	8	-0.117086	8
N049	17	2	3	0.0878245	5	58	12	1	2	1	4	6	8	-0.117086	8
N049	18	2	2	0.0722884	5	58	12	1	1	1	4	6	8	-0.117086	9
N049	19	2	1	0.420319	5	58	12	1	2	1	4	6	8	-0.117086	9
N049	20	2	3	0.0886627	5	58	12	1	2	1	4	6	8	-0.117086	10
N049	21		4		5	58	12	1	2	1	4	6	8	-0.117086	11
N049	22	2	2	0.0189371	5	58	12	1	2	1	4	6	8	-0.117086	12
N049	23	2	2	0.0912762	5	58	12	1	2	1	4	6	8	-0.117086	13
N049	24	2	3	0.155761	5	58	12	1	2	1	4	6	8	-0.117086	14
N049	25	2	2	0	5	58	12	1	2	1	4	6	8	-0.117086	15
N049	26	2	3	0.763577	5	58	12	1	2	1	4	6	8	-0.117086	16
N049	27	2	4	0.384713	5	58	12	1	2	1	4	6	8	-0.117086	17
N049	28	2	2	0	5	58	12	1	2	1	4	6	8	-0.117086	18
N049	29	2	1	2.28359	5	58	12	1	2	1	4	6	8	-0.117086	19
N049	30	2	3	0.602664	5	58	12	1	2	1	4	6	8	-0.117086	20
N049	31	3	4	0.186951	5	58	12	1	2	1	4	6	8	-0.117086	21
N049	32	2	3	0.498008	5	58	12	1	2	1	4	6	8	-0.117086	22
N049	33	2	3	1.11782	5	58	12	1	2	1	4	6	8	-0.117086	23
N049	34	2	4	0.00477841	5	58	12	1	2	1	4	6	8	-0.117086	24
N049	35	2	4	0.0820673	5	58	12	1	2	1	4	6	8	-0.117086	25
N049	36	2	3	0.236981	5	58	12	1	1	1	4	6	8	-0.117086	10
N049	37	2	4	1.266	5	58	12	1	2	1	4	6	8	-0.117086	26
N049	38	2	2	0.901725	5	58	12	1	2	1	4	6	8	-0.117086	27
N049	39	2	4	0.0235549	5	58	12	1	2	1	4	6	8	-0.117086	28
N049	40	2	4	0.260824	5	58	12	1	2	1	4	6	8	-0.117086	29
N050	2	1	1	0.768746	3	44	5	1	2	1	3	2	5	-1.07436	1
N050	3	1	1	0.443207	3	44	5	1	2	1	3	2	5	-1.07436	2
N050	4	1	2	0.281857	3	44	5	1	1	1	3	2	5	-1.07436	1
N050	5	1	1	0.558492	3	44	5	1	2	1	3	2	5	-1.07436	3
N050	6	1	4	0.781156	3	44	5	1	2	1	3	2	5	-1.07436	4
N050	7	3	1	0.431906	3	44	5	1	2	1	3	2	5	-1.07436	5
N050	8	3	2	0.0641688	3	44	5	1	1	1	3	2	5	-1.07436	2
N050	9	4	1	0.906368	3	44	5	1	2	1	3	2	5	-1.07436	6
N050	10	1	2	0.219488	3	44	5	1	2	1	3	2	5	-1.07436	7
N050	11	1	1	0.0301595	3	44	5	1	2	1	3	2	5	-1.07436	8
N050	12	3	3	0.276564	3	44	5	1	2	1	3	2	5	-1.07436	9
N050	13	1	1	0.31085	3	44	5	1	2	1	3	2	5	-1.07436	10
N050	14	2	2	0.118408	3	44	5	1	2	1	3	2	5	-1.07436	11
N050	15	2	1	0.126848	3	44	5	1	2	1	3	2	5	-1.07436	12
N050	16	3	2	0.397972	3	44	5	1	2	1	3	2	5	-1.07436	13
N050	17	3	3	0.441688	3	44	5	1	1	1	3	2	5	-1.07436	3
N050	18	3	2	0.442015	3	44	5	1	1	1	3	2	5	-1.07436	4
N050	19	4	1	0.843526	3	44	5	1	1	1	3	2	5	-1.07436	5
N050	20	4	3	0.735783	3	44	5	1	1	1	3	2	5	-1.07436	6
N050	21	1	4	1.72207	3	44	5	1	2	1	3	2	5	-1.07436	14
N050	22	1	2	0.156889	3	44	5	1	2	1	3	2	5	-1.07436	15
N050	23	1	2	0.282945	3	44	5	1	2	1	3	2	5	-1.07436	16
N050	24	3	3	0.372505	3	44	5	1	2	1	3	2	5	-1.07436	17
N050	25	2	2	0.444278	3	44	5	1	1	1	3	2	5	-1.07436	7
N050	26	2	3	0.223852	3	44	5	1	1	1	3	2	5	-1.07436	8
N050	27	2	4	0.573636	3	44	5	1	2	1	3	2	5	-1.07436	18
N050	28	2	2	0.395129	3	44	5	1	1	1	3	2	5	-1.07436	9
N050	29	2	1	0.177846	3	44	5	1	2	1	3	2	5	-1.07436	19
N050	30	1	3	0.270236	3	44	5	1	2	1	3	2	5	-1.07436	20
N050	31	1	4	0.0972791	3	44	5	1	2	1	3	2	5	-1.07436	21
N050	32	1	3	0.464986	3	44	5	1	2	1	3	2	5	-1.07436	22
N050	33	1	3	0.646008	3	44	5	1	2	1	3	2	5	-1.07436	23
N050	34	2	4	1.49425	3	44	5	1	2	1	3	2	5	-1.07436	24
N050	35	2	4	0.231791	3	44	5	1	2	1	3	2	5	-1.07436	25
N050	36	2	3	1.26121	3	44	5	1	2	1	3	2	5	-1.07436	26
N050	37	1	4	0.252093	3	44	5	1	2	1	3	2	5	-1.07436	27
N050	38	1	2	0.33671	3	44	5	1	2	1	3	2	5	-1.07436	28
N050	39	1	4	1.23134	3	44	5	1	2	1	3	2	5	-1.07436	29
N050	40	1	4	0.757133	3	44	5	1	2	1	3	2	5	-1.07436	30
N051	2	1	1	0.416342	1	54	11	2	2	1	1	12	2	-0.390593	1
N051	3	3	1	0.029001	1	54	11	2	1	1	1	12	2	-0.390593	1
N051	4	4	2	2.06125	1	54	11	2	1	1	1	12	2	-0.390593	2
N051	5	1	1	0	1	54	11	2	2	1	1	12	2	-0.390593	2
N051	6	2	4	0.251839	1	54	11	2	1	1	1	12	2	-0.390593	3
N051	7	3	1	0.0910653	1	54	11	2	2	1	1	12	2	-0.390593	3
N051	8	4	2	0.119759	1	54	11	2	1	1	1	12	2	-0.390593	4
N051	9	1	1	0.570563	1	54	11	2	1	1	1	12	2	-0.390593	5
N051	10	4	2	0.64524	1	54	11	2	2	1	1	12	2	-0.390593	4
N051	11	4	1	0	1	54	11	2	1	1	1	12	2	-0.390593	6
N051	12	1	3	0.0577873	1	54	11	2	2	1	1	12	2	-0.390593	5
N051	13	1	1	0.299753	1	54	11	2	2	1	1	12	2	-0.390593	6
N051	14	3	2	0.00656721	1	54	11	2	2	1	1	12	2	-0.390593	7
N051	15	3	1	0.219488	1	54	11	2	1	1	1	12	2	-0.390593	7
N051	16	1	2	0.0995947	1	54	11	2	1	1	1	12	2	-0.390593	8
N051	17	4	3	0.705655	1	54	11	2	2	1	1	12	2	-0.390593	8
N051	18	1	2	0.0172903	1	54	11	2	2	1	1	12	2	-0.390593	9
N051	19	3	1	0.207687	1	54	11	2	2	1	1	12	2	-0.390593	10
N051	20	3	3	0.370996	1	54	11	2	1	1	1	12	2	-0.390593	9
N051	21	4	4	0.519107	1	54	11	2	2	1	1	12	2	-0.390593	11
N051	22	2	2	0.2937	1	54	11	2	1	1	1	12	2	-0.390593	10
N051	23	1	2	1.67108	1	54	11	2	2	1	1	12	2	-0.390593	12
N051	24	3	3	0.291977	1	54	11	2	2	1	1	12	2	-0.390593	13
N051	25	4	2	0.0204816	1	54	11	2	2	1	1	12	2	-0.390593	14
N051	26	1	3	0.682321	1	54	11	2	2	1	1	12	2	-0.390593	15
N051	27	4	4	0.206536	1	54	11	2	2	1	1	12	2	-0.390593	16
N051	28	1	2	1.3766	1	54	11	2	1	1	1	12	2	-0.390593	11
N051	29	3	1	0.0662651	1	54	11	2	2	1	1	12	2	-0.390593	17
N051	30	3	3	0.00323035	1	54	11	2	1	1	1	12	2	-0.390593	12
N051	31	3	4	0.76044	1	54	11	2	2	1	1	12	2	-0.390593	18
N051	32	1	3	0.0157161	1	54	11	2	1	1	1	12	2	-0.390593	13
N051	33	4	3	0	1	54	11	2	1	1	1	12	2	-0.390593	14
N051	34	4	4	0	1	54	11	2	2	1	1	12	2	-0.390593	19
N051	35	4	4	0.451105	1	54	11	2	2	1	1	12	2	-0.390593	20
N051	36	1	3	0.38518	1	54	11	2	2	1	1	12	2	-0.390593	21
N051	37	1	4	0.715064	1	54	11	2	1	1	1	12	2	-0.390593	15
N051	38	4	2	0.589429	1	54	11	2	2	1	1	12	2	-0.390593	22
N051	39	4	4	0.0330376	1	54	11	2	2	1	1	12	2	-0.390593	23
N051	40	4	4	0.726394	1	54	11	2	2	1	1	12	2	-0.390593	24
N052	2	4	1	0.162663	11	94	13	1	1	1	4	11	12	2.34448	1
N052	3	4	1	0.299611	11	94	13	1	1	1	4	11	12	2.34448	2
N052	4	4	2	0.0104021	11	94	13	1	1	1	4	11	12	2.34448	3
N052	5	4	1	0.0116086	11	94	13	1	1	1	4	11	12	2.34448	4
N052	6	4	4	0.179572	11	94	13	1	1	1	4	11	12	2.34448	5
N052	7	4	1	0.127735	11	94	13	1	1	1	4	11	12	2.34448	6
N052	8	1	2	0.0654575	11	94	13	1	1	1	4	11	12	2.34448	7
N052	9	1	1	0.104925	11	94	13	1	2	1	4	11	12	2.34448	1
N052	10	4	2	0.082475	11	94	13	1	2	1	4	11	12	2.34448	2
N052	11	4	1	0.271324	11	94	13	1	1	1	4	11	12	2.34448	8
N052	12	4	3	0.360609	11	94	13	1	2	1	4	11	12	2.34448	3
N052	13	4	1	1.53578	11	94	13	1	1	1	4	11	12	2.34448	9
N052	14	4	2	0	11	94	13	1	1	1	4	11	12	2.34448	10
N052	15	4	1	0.223768	11	94	13	1	2	1	4	11	12	2.34448	4
N052	16	4	2	0.192963	11	94	13	1	1	1	4	11	12	2.34448	11
N052	17	4	3	0.0354442	11	94	13	1	1	1	4	11	12	2.34448	12
N052	18	4	2	0.0545388	11	94	13	1	2	1	4	11	12	2.34448	5
N052	19	4	1	0.0398356	11	94	13	1	1	1	4	11	12	2.34448	13
N052	20	4	3	0	11	94	13	1	1	1	4	11	12	2.34448	14
N052	21	4	4	0.340354	11	94	13	1	1	1	4	11	12	2.34448	15
N052	22	4	2	0.083785	11	94	13	1	2	1	4	11	12	2.34448	6
N052	23	4	2	1.66394	11	94	13	1	1	1	4	11	12	2.34448	16
N052	24	4	3	0.0201993	11	94	13	1	1	1	4	11	12	2.34448	17
N052	25	4	2	0.181406	11	94	13	1	2	1	4	11	12	2.34448	7
N052	26	4	3	0.000908695	11	94	13	1	1	1	4	11	12	2.34448	18
N052	27	4	4	0.144364	11	94	13	1	2	1	4	11	12	2.34448	8
N052	28	4	2	0.659075	11	94	13	1	1	1	4	11	12	2.34448	19
N052	29	4	1	0.00263844	11	94	13	1	2	1	4	11	12	2.34448	9
N052	30	4	3	0.0577948	11	94	13	1	1	1	4	11	12	2.34448	20
N052	31	4	4	0.112004	11	94	13	1	2	1	4	11	12	2.34448	10
N052	32	4	3	0.328056	11	94	13	1	1	1	4	11	12	2.34448	21
N052	33	4	3	0.0034907	11	94	13	1	2	1	4	11	12	2.34448	11
N052	34	4	4	0.353878	11	94	13	1	2	1	4	11	12	2.34448	12
N052	35	4	4	0	11	94	13	1	2	1	4	11	12	2.34448	13
N052	36	4	3	0.453061	11	94	13	1	2	1	4	11	12	2.34448	14
N052	37	4	4	0.0295664	11	94	13	1	2	1	4	11	12	2.34448	15
N052	38	4	2	0.115277	11	94	13	1	1	1	4	11	12	2.34448	22
N052	39	4	4	0.230162	11	94	13	1	1	1	4	11	12	2.34448	23
N052	40	4	4	0.0494522	11	94	13	1	2	1	4	11	12	2.34448	16
N053	2	2	1	0.186262	7	35	3	2	1	1	7	2	9	-1.68975	1
N053	3	1	1	0.165165	7	35	3	2	2	1	7	2	9	-1.68975	1
N053	4	2	2	0.317875	7	35	3	2	2	1	7	2	9	-1.68975	2
N053	5	1	1	0.0395706	7	35	3	2	1	1	7	2	9	-1.68975	2
N053	6	3	4	0.140967	7	35	3	2	2	1	7	2	9	-1.68975	3
N053	7	2	1	0.0799962	7	35	3	2	1	1	7	2	9	-1.68975	3
N053	8	2	2	0.0775464	7	35	3	2	1	1	7	2	9	-1.68975	4
N053	9	1	1	0.208477	7	35	3	2	1	1	7	2	9	-1.68975	5
N053	10	3	2	0.234559	7	35	3	2	2	1	7	2	9	-1.68975	4
N053	11	1	1	0.0455931	7	35	3	2	1	1	7	2	9	-1.68975	6
N053	12	2	3	0.103694	7	35	3	2	2	1	7	2	9	-1.68975	5
N053	13	2	1	0.160318	7	35	3	2	2	1	7	2	9	-1.68975	6
N053	14	1	2	0.0571551	7	35	3	2	1	1	7	2	9	-1.68975	7
N053	15	2	1	0.226842	7	35	3	2	2	1	7	2	9	-1.68975	7
N053	16	2	2	0.0318802	7	35	3	2	1	1	7	2	9	-1.68975	8
N053	17	1	3	0.857671	7	35	3	2	2	1	7	2	9	-1.68975	8
N053	18	3	2	0.194061	7	35	3	2	2	1	7	2	9	-1.68975	9
N053	19	1	1	1.57796	7	35	3	2	2	1	7	2	9	-1.68975	10
N053	20	3	3	0.150831	7	35	3	2	2	1	7	2	9	-1.68975	11
N053	21		4		7	35	3	2	2	1	7	2	9	-1.68975	12
N053	22	4	2	0.516448	7	35	3	2	2	1	7	2	9	-1.68975	13
N053	23	2	2	0.0744852	7	35	3	2	1	1	7	2	9	-1.68975	9
N053	24	2	3	0.148829	7	35	3	2	2	1	7	2	9	-1.68975	14
N053	25	3	2	0.156707	7	35	3	2	1	1	7	2	9	-1.68975	10
N053	26	2	3	0.184298	7	35	3	2	1	1	7	2	9	-1.68975	11
N053	27	4	4	0.271751	7	35	3	2	2	1	7	2	9	-1.68975	15
N053	28	4	2	0.365421	7	35	3	2	2	1	7	2	9	-1.68975	16
N053	29	2	1	0.0593727	7	35	3	2	1	1	7	2	9	-1.68975	12
N053	30	1	3	0.0881329	7	35	3	2	1	1	7	2	9	-1.68975	13
N053	31	3	4	0.0488607	7	35	3	2	2	1	7	2	9	-1.68975	17
N053	32	4	3	0.28694	7	35	3	2	1	1	7	2	9	-1.68975	14
N053	33	2	3	0.435209	7	35	3	2	2	1	7	2	9	-1.68975	18
N053	34	4	4	0.0622179	7	35	3	2	2	1	7	2	9	-1.68975	19
N053	35	4	4	0.0798399	7	35	3	2	1	1	7	2	9	-1.68975	15
N053	36	2	3	0.100372	7	35	3	2	2	1	7	2	9	-1.68975	20
N053	37	4	4	0.0376403	7	35	3	2	2	1	7	2	9	-1.68975	21
N053	38	3	2	0.0936772	7	35	3	2	2	1	7	2	9	-1.68975	22
N053	39	4	4	0	7	35	3	2	2	1	7	2	9	-1.68975	23
N053	40	4	4	0.0268765	7	35	3	2	2	1	7	2	9	-1.68975	24
N054	2	4	1		8	55	20	2	1	2	7	11	11	-0.322216	1
N054	3	4	1		8	55	20	2	1	2	7	11	11	-0.322216	2
N054	4	4	2		8	55	20	2	1	2	7	11	11	-0.322216	3
N054	5	4	1		8	55	20	2	1	2	7	11	11	-0.322216	4
N054	6	4	4	0.751889	8	55	20	2	2	2	7	11	11	-0.322216	1
N054	7	4	1	0.525455	8	55	20	2	1	2	7	11	11	-0.322216	5
N054	8	4	2	0.816196	8	55	20	2	1	2	7	11	11	-0.322216	6
N054	9	4	1	0.0618768	8	55	20	2	1	2	7	11	11	-0.322216	7
N054	10	4	2	0.471681	8	55	20	2	1	2	7	11	11	-0.322216	8
N054	11	4	1	0.0849679	8	55	20	2	2	2	7	11	11	-0.322216	2
N054	12	4	3	0.088136	8	55	20	2	2	2	7	11	11	-0.322216	3
N054	13	4	1	2.09803	8	55	20	2	1	2	7	11	11	-0.322216	9
N054	14	4	2	0.458049	8	55	20	2	2	2	7	11	11	-0.322216	4
N054	15	4	1	0.137689	8	55	20	2	1	2	7	11	11	-0.322216	10
N054	16	4	2	0.188557	8	55	20	2	1	2	7	11	11	-0.322216	11
N054	17	4	3	1.99569	8	55	20	2	1	2	7	11	11	-0.322216	12
N054	18	4	2	0.0336233	8	55	20	2	1	2	7	11	11	-0.322216	13
N054	19	3	1	4.41378	8	55	20	2	1	2	7	11	11	-0.322216	14
N054	20	4	3	0.135101	8	55	20	2	1	2	7	11	11	-0.322216	15
N054	21	4	4	0.454536	8	55	20	2	2	2	7	11	11	-0.322216	5
N054	22	4	2	0.0329151	8	55	20	2	2	2	7	11	11	-0.322216	6
N054	23	3	2	1.89862	8	55	20	2	2	2	7	11	11	-0.322216	7
N054	24	4	3	0.999775	8	55	20	2	1	2	7	11	11	-0.322216	16
N054	25	4	2	0.44428	8	55	20	2	2	2	7	11	11	-0.322216	8
N054	26	4	3	0.716445	8	55	20	2	2	2	7	11	11	-0.322216	9
N054	27	3	4	0.572045	8	55	20	2	2	2	7	11	11	-0.322216	10
N054	28	3	2	0.199997	8	55	20	2	1	2	7	11	11	-0.322216	17
N054	29	4	1	0.896247	8	55	20	2	2	2	7	11	11	-0.322216	11
N054	30	4	3	0.525598	8	55	20	2	1	2	7	11	11	-0.322216	18
N054	31	4	4	2.44352	8	55	20	2	1	2	7	11	11	-0.322216	19
N054	32	3	3	1.22559	8	55	20	2	2	2	7	11	11	-0.322216	12
N054	33	1	3	2.62338	8	55	20	2	1	2	7	11	11	-0.322216	20
N054	34	3	4	0.0893092	8	55	20	2	2	2	7	11	11	-0.322216	13
N054	35	4	4	0.0585367	8	55	20	2	1	2	7	11	11	-0.322216	21
N054	36	4	3	0.355751	8	55	20	2	2	2	7	11	11	-0.322216	14
N054	37	4	4	0.200643	8	55	20	2	2	2	7	11	11	-0.322216	15
N054	38	3	2	0.0746403	8	55	20	2	2	2	7	11	11	-0.322216	16
N054	39	3	4	1.21457	8	55	20	2	2	2	7	11	11	-0.322216	17
N054	40	2	4	0.366489	8	55	20	2	2	2	7	11	11	-0.322216	18
N055	2	1	1	0.0506595	13	65	21	2	2	1	8	11	11	0.361552	1
N055	3	1	1	0.135874	13	65	21	2	2	1	8	11	11	0.361552	2
N055	4	3	2	0.0844722	13	65	21	2	2	1	8	11	11	0.361552	3
N055	5	2	1	0.00396733	13	65	21	2	1	1	8	11	11	0.361552	1
N055	6	2	4	0.0474911	13	65	21	2	2	1	8	11	11	0.361552	4
N055	7	2	1	0.266276	13	65	21	2	2	1	8	11	11	0.361552	5
N055	8	2	2	0.24354	13	65	21	2	1	1	8	11	11	0.361552	2
N055	9	2	1	0.202663	13	65	21	2	1	1	8	11	11	0.361552	3
N055	10	2	2	0.0827374	13	65	21	2	1	1	8	11	11	0.361552	4
N055	11	2	1	0.0014183	13	65	21	2	2	1	8	11	11	0.361552	6
N055	12	2	3	0.174075	13	65	21	2	2	1	8	11	11	0.361552	7
N055	13	2	1	0.11047	13	65	21	2	1	1	8	11	11	0.361552	5
N055	14	2	2	0.0191548	13	65	21	2	1	1	8	11	11	0.361552	6
N055	15	2	1	0.156431	13	65	21	2	2	1	8	11	11	0.361552	8
N055	16	3	2	0.0419332	13	65	21	2	2	1	8	11	11	0.361552	9
N055	17	3	3	0.0467171	13	65	21	2	1	1	8	11	11	0.361552	7
N055	18	2	2	0.141769	13	65	21	2	1	1	8	11	11	0.361552	8
N055	19	1	1	0.106993	13	65	21	2	2	1	8	11	11	0.361552	10
N055	20	2	3	0.0907854	13	65	21	2	2	1	8	11	11	0.361552	11
N055	21	2	4	0.0282785	13	65	21	2	2	1	8	11	11	0.361552	12
N055	22	4	2	0.102212	13	65	21	2	1	1	8	11	11	0.361552	9
N055	23	2	2	0.0400145	13	65	21	2	1	1	8	11	11	0.361552	10
N055	24	3	3	3.66992	13	65	21	2	2	1	8	11	11	0.361552	13
N055	25	2	2	0.226073	13	65	21	2	2	1	8	11	11	0.361552	14
N055	26	4	3	0	13	65	21	2	2	1	8	11	11	0.361552	15
N055	27	3	4	0.0245007	13	65	21	2	2	1	8	11	11	0.361552	16
N055	28	3	2	0.00970138	13	65	21	2	1	1	8	11	11	0.361552	11
N055	29	2	1	0.0864642	13	65	21	2	2	1	8	11	11	0.361552	17
N055	30	3	3	0.0245429	13	65	21	2	2	1	8	11	11	0.361552	18
N055	31	4	4	0.0650293	13	65	21	2	2	1	8	11	11	0.361552	19
N055	32	4	3	0.00487792	13	65	21	2	2	1	8	11	11	0.361552	20
N055	33	4	3	1.15649	13	65	21	2	2	1	8	11	11	0.361552	21
N055	34	3	4	0	13	65	21	2	2	1	8	11	11	0.361552	22
N055	35	3	4	0.131511	13	65	21	2	2	1	8	11	11	0.361552	23
N055	36	2	3	0.609771	13	65	21	2	2	1	8	11	11	0.361552	24
N055	37	2	4	0.0842342	13	65	21	2	2	1	8	11	11	0.361552	25
N055	38	2	2	0.129935	13	65	21	2	1	1	8	11	11	0.361552	12
N055	39	2	4	0.498305	13	65	21	2	2	1	8	11	11	0.361552	26
N055	40	3	4	0.100076	13	65	21	2	2	1	8	11	11	0.361552	27
N056	2	1	1	0.175868	8	56	14	2	2	1	8	15	14	-0.253839	1
N056	3	1	1	0.279592	8	56	14	2	1	1	8	15	14	-0.253839	1
N056	4	1	2	0.160414	8	56	14	2	2	1	8	15	14	-0.253839	2
N056	5		1		8	56	14	2	1	1	8	15	14	-0.253839	2
N056	6	1	4	0.10396	8	56	14	2	2	1	8	15	14	-0.253839	3
N056	7	1	1	0.146674	8	56	14	2	2	1	8	15	14	-0.253839	4
N056	8		2		8	56	14	2	2	1	8	15	14	-0.253839	5
N056	9	1	1	0.0159719	8	56	14	2	2	1	8	15	14	-0.253839	6
N056	10	1	2	5.37123	8	56	14	2	1	1	8	15	14	-0.253839	3
N056	11	1	1	0.110577	8	56	14	2	2	1	8	15	14	-0.253839	7
[truncated: 575 more rows]
